# Supplementary material for: Tetroazolemycins A and B, Two New Oxazole-Thiazole Siderophores from Deep-Sea Streptomyces olivaceus FXJ8.012
Source: Mar Drugs. 2013 May 9;11(5):1524–33. doi: 10.3390/md11051524 (PMC3707159; doi:10.3390/md11051524)

## Supplementary Information

**Table S1.**  $^1\text{H}$  and  $^{13}\text{C}$ -NMR Data of **3–5** ( $\delta$  in ppm,  $J$  in Hz).

**Figure S1.** HR-ESI-MS spectrum of **1**.

**Figure S2.** UV spectrum of **1**.

**Figure S3.** IR spectrum of **1**.

**Figure S4.**  $^1\text{H}$ -NMR spectrum (600 MHz, Acetone- $d_6$ ) of **1**.

**Figure S5.**  $^{13}\text{C}$ -NMR spectrum (150 MHz, Acetone- $d_6$ ) of **1**.

**Figure S6.** DEPT 135 spectrum (150 MHz, Acetone- $d_6$ ) of **1**.

**Figure S7.**  $^1\text{H}$ - $^1\text{H}$ -COSY spectrum (600  $\times$  600 MHz, Acetone- $d_6$ ) of **1**.

**Figure S8.**  $^1\text{H}$ - $^{13}\text{C}$ -HSQC spectrum (600  $\times$  150 MHz, Acetone- $d_6$ ) of **1**.

**Figure S9.**  $^1\text{H}$ - $^{13}\text{C}$ -HMBC spectrum (600  $\times$  150 MHz, Acetone- $d_6$ ) of **1**.

**Figure S10.**  $^1\text{H}$ - $^1\text{H}$ -ROESY spectrum (600  $\times$  600 MHz, Acetone- $d_6$ ) of **1**.

**Figure S11.** NOE difference spectrum (H-10 irradiated) (600 MHz, Acetone- $d_6$ ) of **1**.

**Figure S12.** NOE difference spectrum (H-8a irradiated) (600 MHz, Acetone- $d_6$ ) of **1**.

**Figure S13.** NOE difference spectrum (H-8b irradiated) (600 MHz, Acetone- $d_6$ ) of **1**.

**Figure S14.** HR-ESI-MS spectrum of **2**.

**Figure S15.** UV spectrum of **2**.

**Figure S16.** IR spectrum of **2**.

**Figure S17.**  $^1\text{H}$ -NMR spectrum (600 MHz, Acetone- $d_6$ ) of **2**.

**Figure S18.**  $^{13}\text{C}$ -NMR spectrum (150 MHz, Acetone- $d_6$ ) of **2**.

**Figure S19.** DEPT 135 spectrum (150 MHz, Acetone- $d_6$ ) of **2**.

**Figure S20.**  $^1\text{H}$ - $^1\text{H}$ -COSY spectrum (600  $\times$  600 MHz, Acetone- $d_6$ ) of **2**.

**Figure S21.**  $^1\text{H}$ - $^{13}\text{C}$ -HSQC spectrum (600  $\times$  150 MHz, Acetone- $d_6$ ) of **2**.

**Figure S22.**  $^1\text{H}$ - $^{13}\text{C}$ -HMBC spectrum (600  $\times$  150 MHz, Acetone- $d_6$ ) of **2**.

**Figure S23.**  $^1\text{H}$ - $^1\text{H}$ -ROESY spectrum (600  $\times$  600 MHz, Acetone- $d_6$ ) of **2**.

**Figure S24.** HR-ESI-MS spectrum of **3**.

**Figure S25.**  $^1\text{H}$ -NMR spectrum (600 MHz,  $\text{CD}_3\text{OD}$ ) of **3**.

**Figure S26.**  $^{13}\text{C}$ -NMR spectrum (150 MHz,  $\text{CD}_3\text{OD}$ ) of **3**.

**Figure S27.** HR-ESI-MS spectrum of **4**.

**Figure S28.**  $^1\text{H}$ -NMR spectrum (600 MHz,  $\text{CD}_3\text{OD}$ ) of **4**.

**Figure S29.**  $^{13}\text{C}$ -NMR spectrum (150 MHz,  $\text{CD}_3\text{OD}$ ) of **4**.

**Figure S30.** HR-ESI-MS spectrum of **5**.

**Figure S31.**  $^1\text{H}$ -NMR spectrum (400 MHz, Acetone- $d_6$ ) of **5**.

**Table S1.**  $^1\text{H}$  and  $^{13}\text{C}$ -NMR Data of **3–5** ( $\delta$  in ppm,  $J$  in Hz).

| Position | Spoxazomicin A (3)  |                     | Spoxazomicin B (4)  |                     | Spoxazomicin C (5)  |
|----------|---------------------|---------------------|---------------------|---------------------|---------------------|
|          | $\delta_{\text{C}}$ | $\delta_{\text{H}}$ | $\delta_{\text{C}}$ | $\delta_{\text{H}}$ | $\delta_{\text{H}}$ |
| 1        | 110.3               | —                   | 110.4               | —                   |                     |
| 2        | 159.7               | —                   | 159.6               | —                   |                     |
| 3        | 116.1               | 6.95 (d; 8.4)       | 116.1               | 6.95 (d; 8.4)       | 6.93 (d; 8.0)       |
| 4        | 133.2               | 7.39 (dd; 8.4,7.8)  | 133.2               | 7.40 (dd; 8.4,7.8)  | 7.41 (dd; 8.0,8.0)  |
| 5        | 118.4               | 6.89 (dd; 7.8,7.8)  | 118.4               | 6.89 (dd; 7.8,7.8)  | 6.88 (dd; 7.6,7.6)  |
| 6        | 127.7               | 7.66 (d; 7.8)       | 127.8               | 7.66 (d; 7.8)       | 7.63 (d; 7.6)       |
| 7        | 166.3               | —                   | 166.3               | —                   |                     |
| 8        | 69.4                | 4.42 (dd; 7.2,8.4)  | 69.2                | 4.3 (dd; 8.4,8.4)   | 4.4 (m)             |
|          |                     | 4.54 (dd; 8.4,9.6)  |                     | 4.51 (dd; 9.0,9.0)  | 4.51 (m)            |
| 9        | 71.3                | 4.65 (m)            | 68.3                | 4.73 (m)            | 4.44 (m)            |
| 10       | 76.5                | 4.20 (d; 5.4)       | 77                  | 4.49 (d; 7.2)       | 3.72 (m)            |
| 11       | 33.3                | 2.87 (dd; 8.4,10.8) | 31.9                | 2.74 (dd; 5.4,10.2) |                     |
|          |                     | 2.99 (dd; 5.4,10.8) |                     | 3.04 (dd; 5.4,10.2) |                     |
| 12       | 71.4                | 3.13 (m)            | 67.7                | 3.58 (m)            |                     |
| 13       | 41.2                | 3.21 (dd; 6.6,13.8) | 38                  | 3.36 (dd; 7.8,13.8) |                     |
|          |                     | 3.48 (dd; 4.2,13.8) |                     | 3.48 (dd; 7.8,13.8) |                     |
| 14       | 172.1               | —                   | 172                 | —                   |                     |
| 15       | 21.2                | 1.99 (s)            | 21.1                | 1.95 (s)            |                     |
| 16       | 41.6                | 2.52 (s)            | 35.4                | 2.50 (s)            |                     |

**Figure S1.** HR-ESI-MS spectrum of **1**.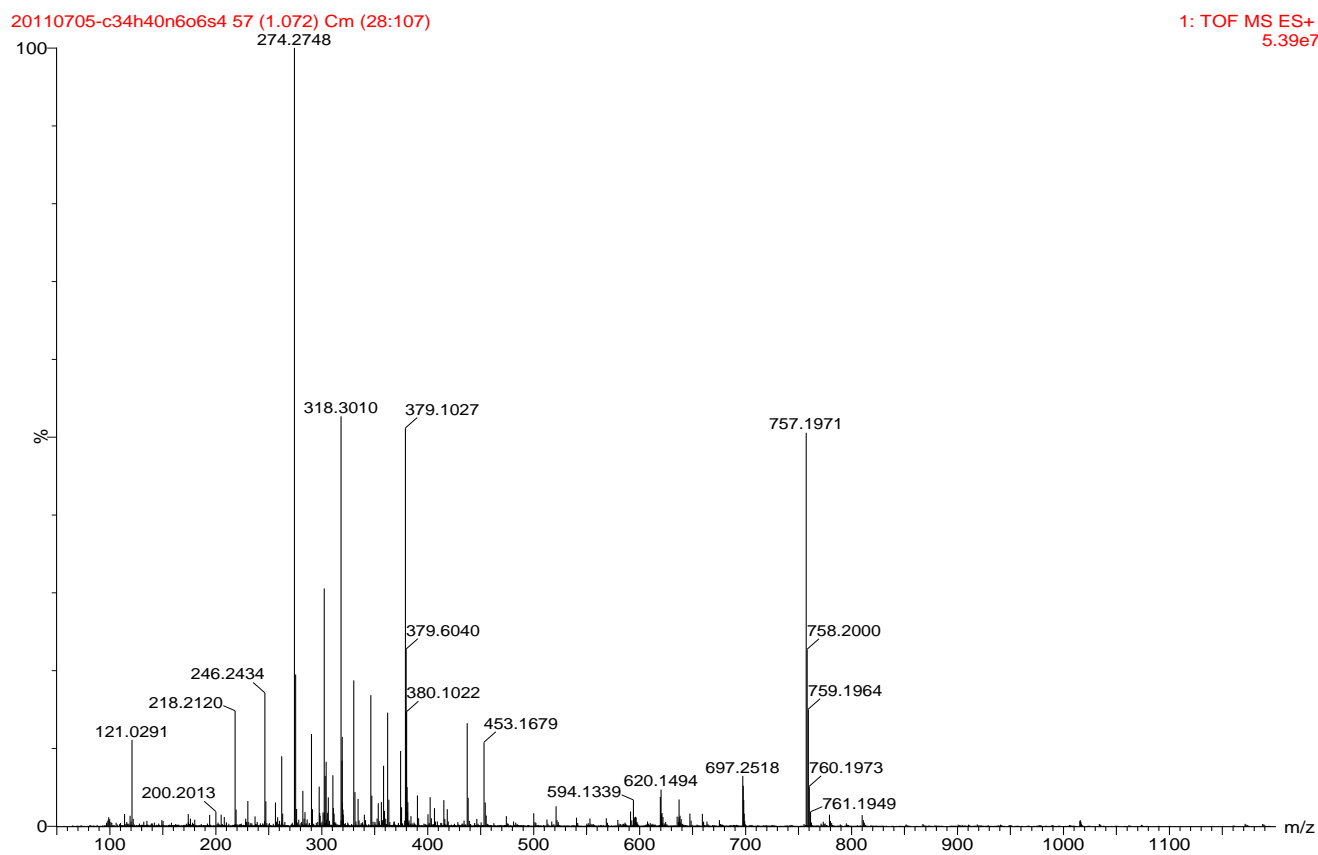**Figure S2.** UV spectrum of **1**.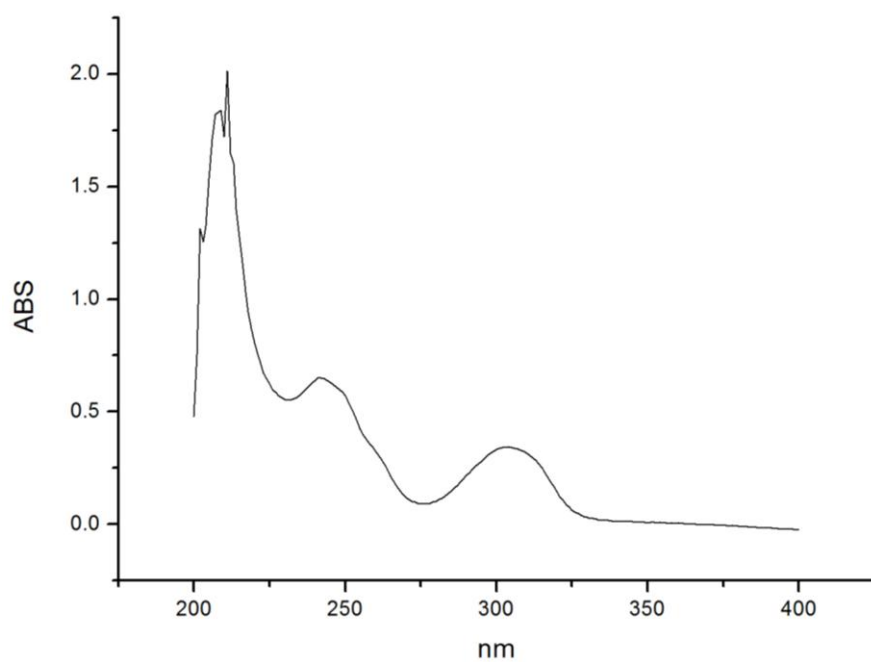

Figure S3. IR spectrum of 1.

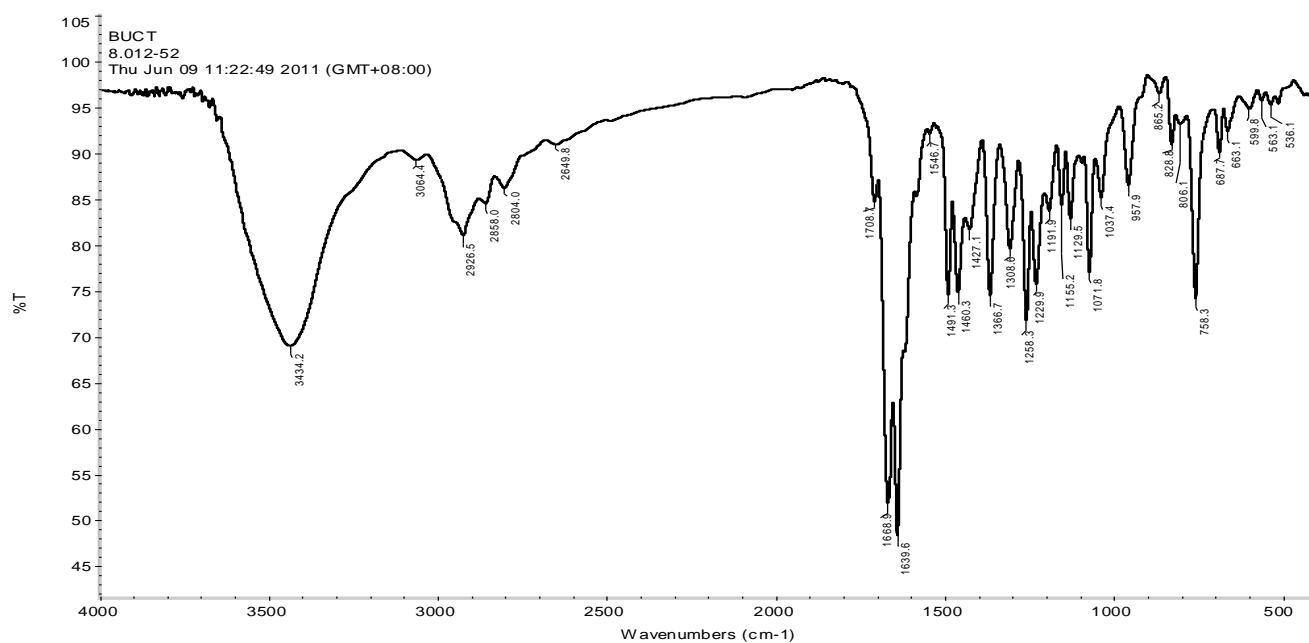Figure S4. <sup>1</sup>H-NMR spectrum (600 MHz, Acetone-*d*<sub>6</sub>) of 1.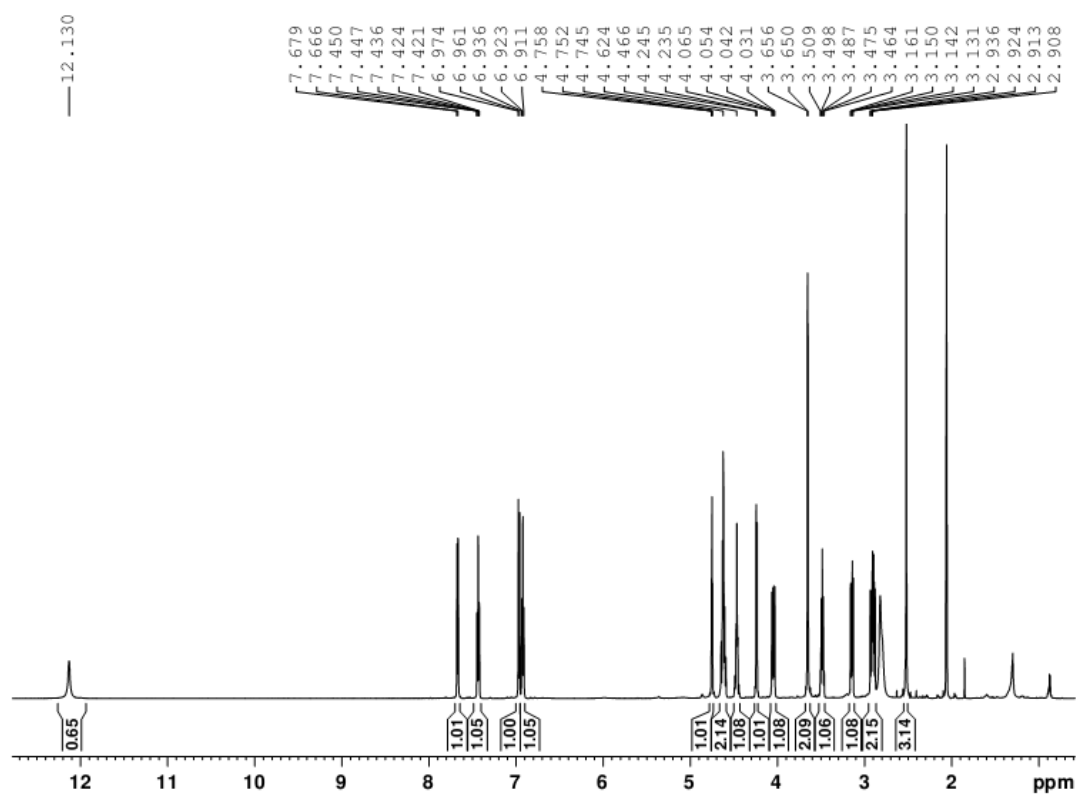

**Figure S5.**  $^{13}\text{C}$ -NMR spectrum (150 MHz, Acetone- $d_6$ ) of **1**.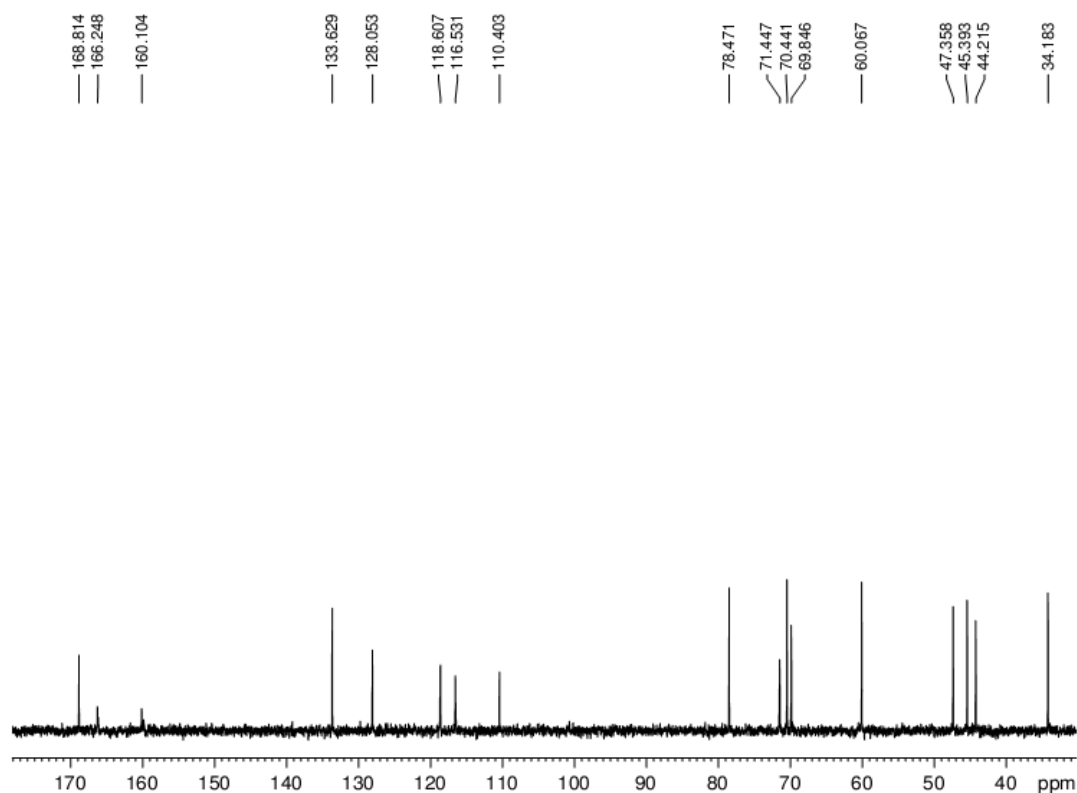**Figure S6.** DEPT135 spectrum (150 MHz, Acetone- $d_6$ ) of **1**.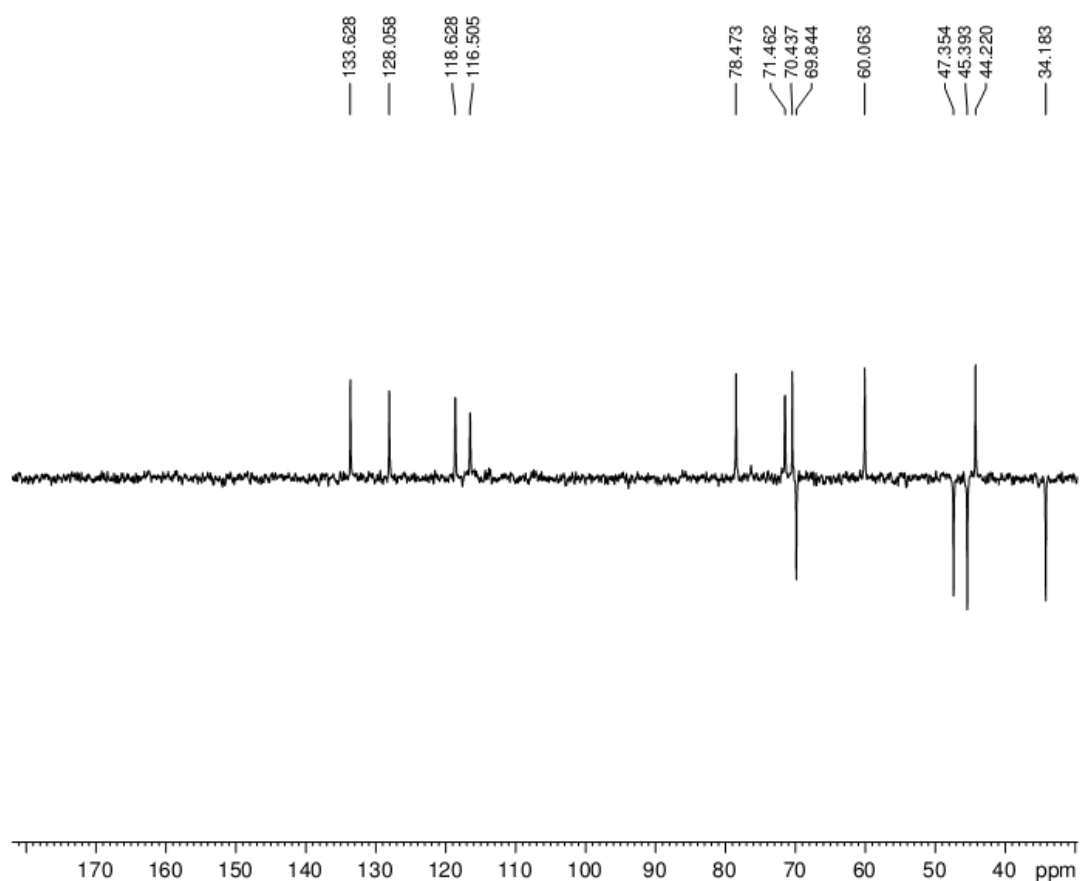

**Figure S7.**  $^1\text{H}$ - $^1\text{H}$ -COSY spectrum ( $600 \times 600$  MHz, Acetone- $d_6$ ) of **1**.

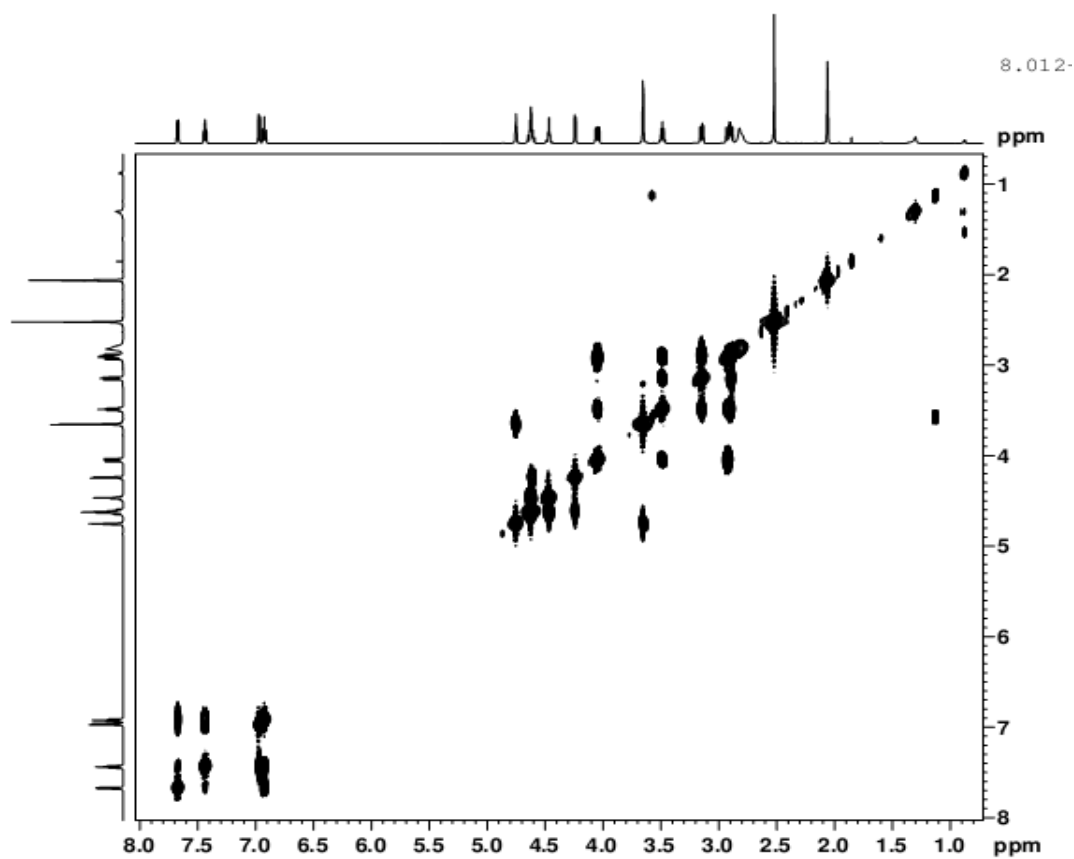

**Figure S8.**  $^1\text{H}$ - $^{13}\text{C}$ -HSQC spectrum ( $600 \times 150$  MHz, Acetone- $d_6$ ) of **1**.

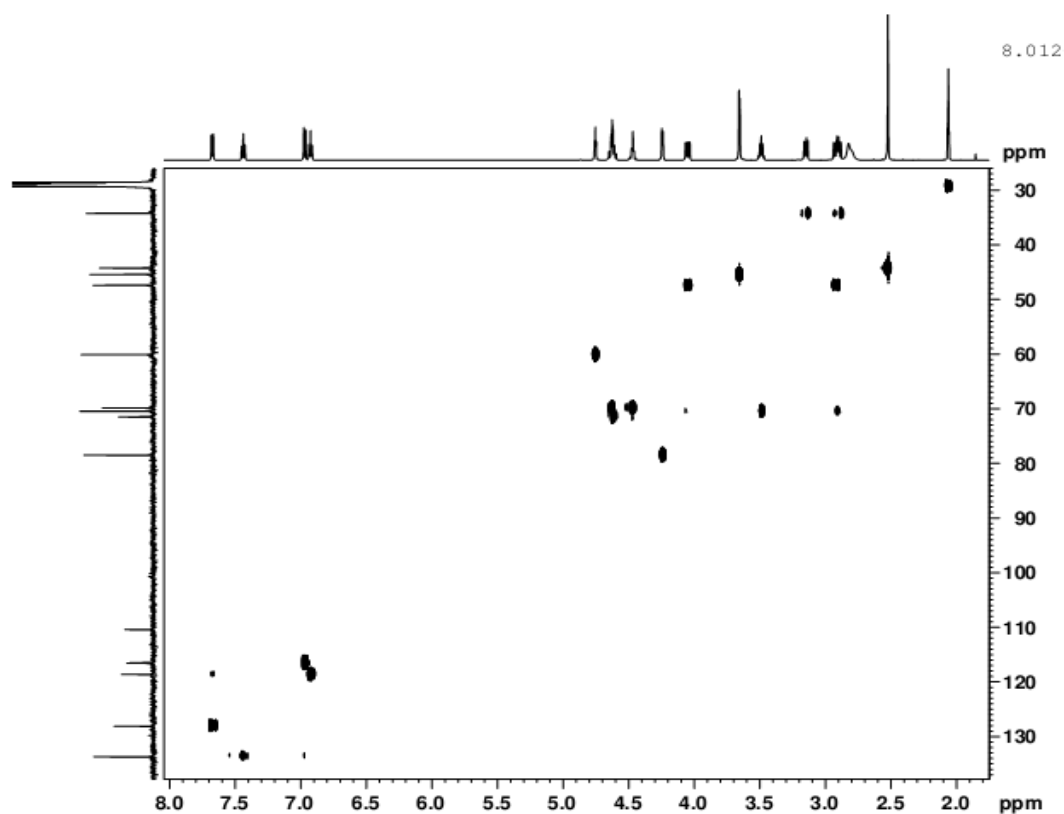

**Figure S9.**  $^1\text{H}$ - $^{13}\text{C}$ -HMBC spectrum ( $600 \times 150$  MHz, Acetone- $d_6$ ) of **1**.

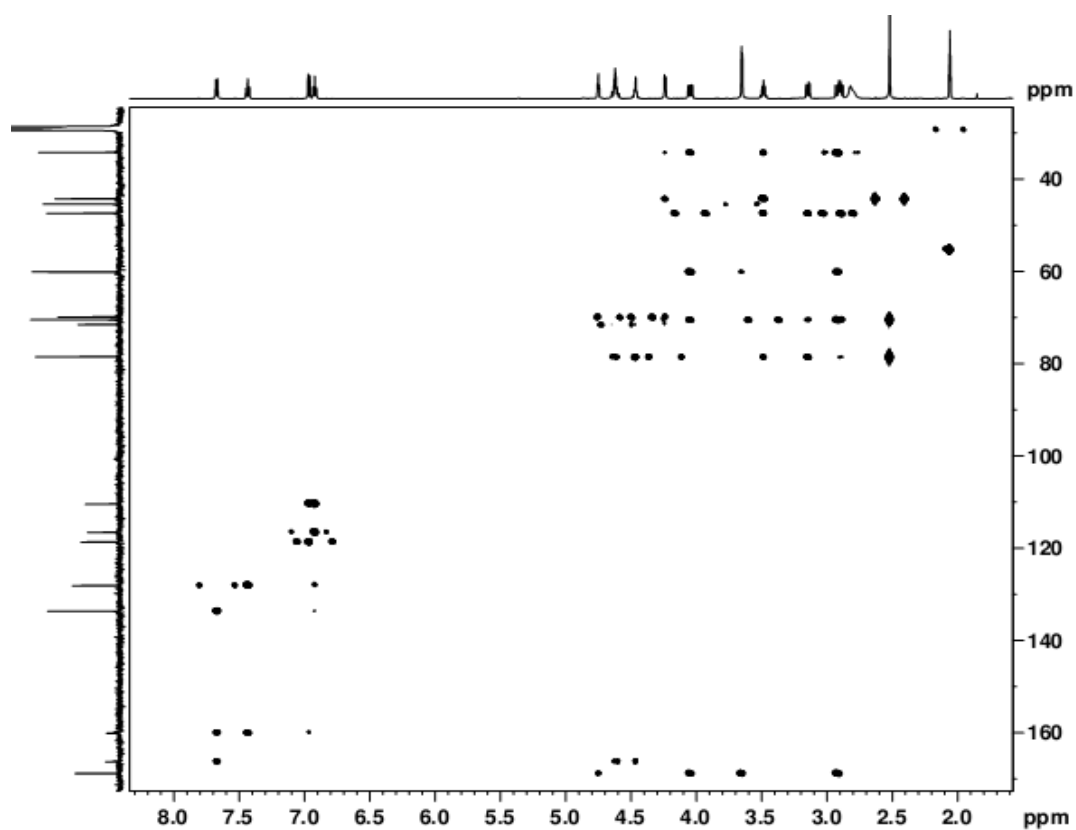

**Figure S10.**  $^1\text{H}$ - $^1\text{H}$ -ROESY spectrum ( $600 \times 600$  MHz, Acetone- $d_6$ ) of **1**.

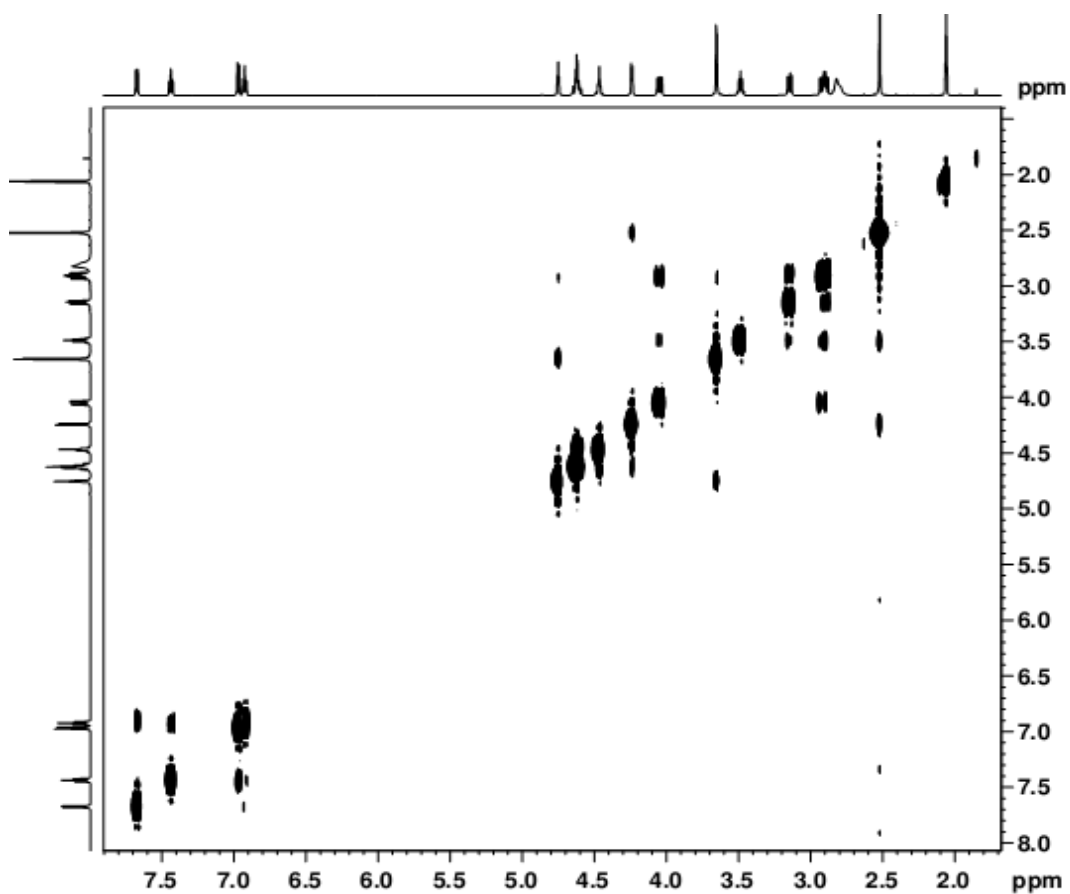

**Figure S11.** NOE difference spectrum (H-10 irradiated) (600 MHz, Acetone- $d_6$ ) of **1**.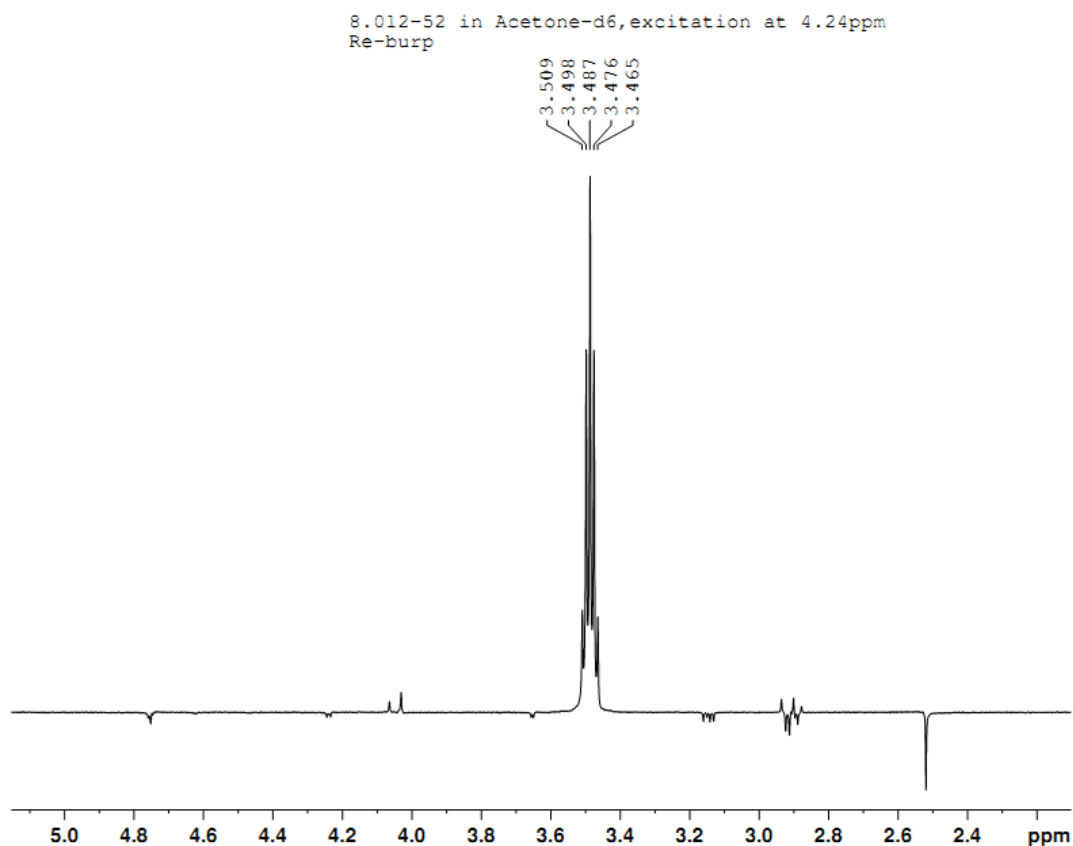**Figure S12.** NOE difference spectrum (H-8a irradiated) (600 MHz, Acetone- $d_6$ ) of **1**.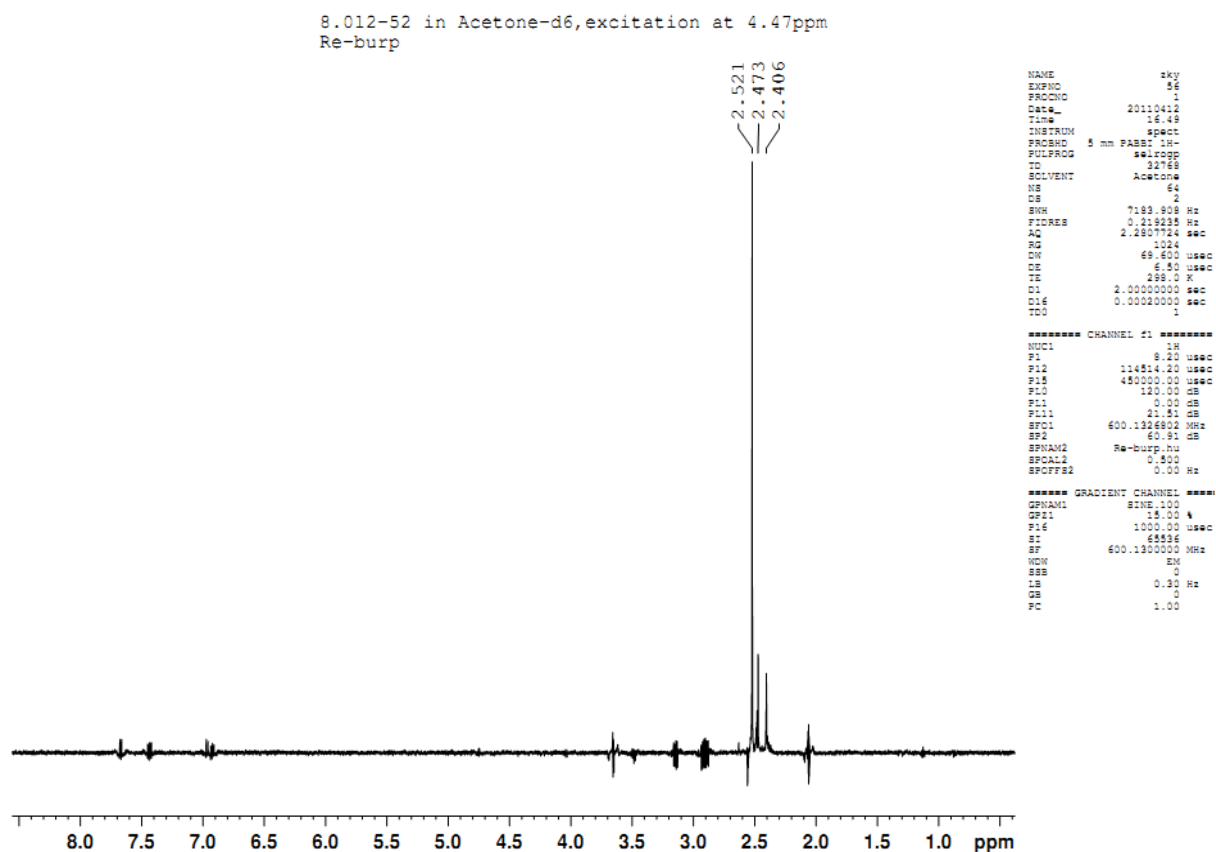

**Figure S13.** NOE difference spectrum (H-8b irradiated) (600 MHz, Acetone- $d_6$ ) of **1**.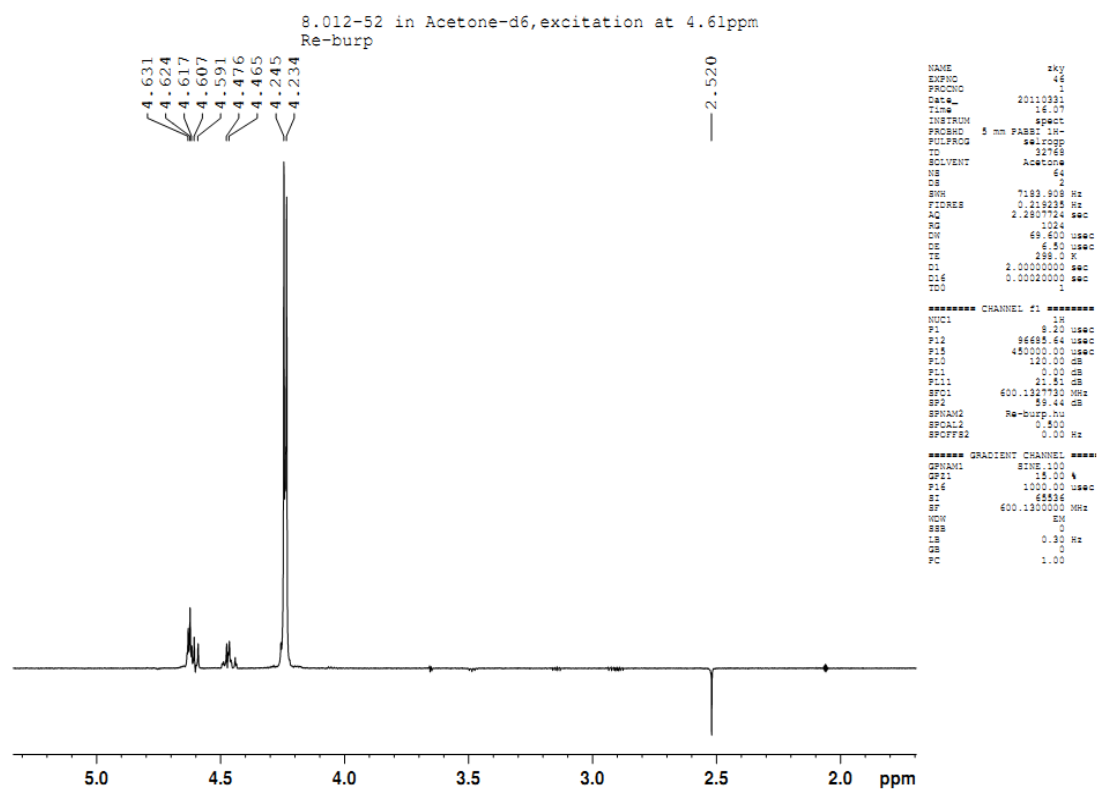**Figure S14.** HR-ESI-MS spectrum of **2**.

20110705-c34h40n6o6s4-2 9 (0.192) Cm (9:72)

1: TOF MS ES+  
3.27e6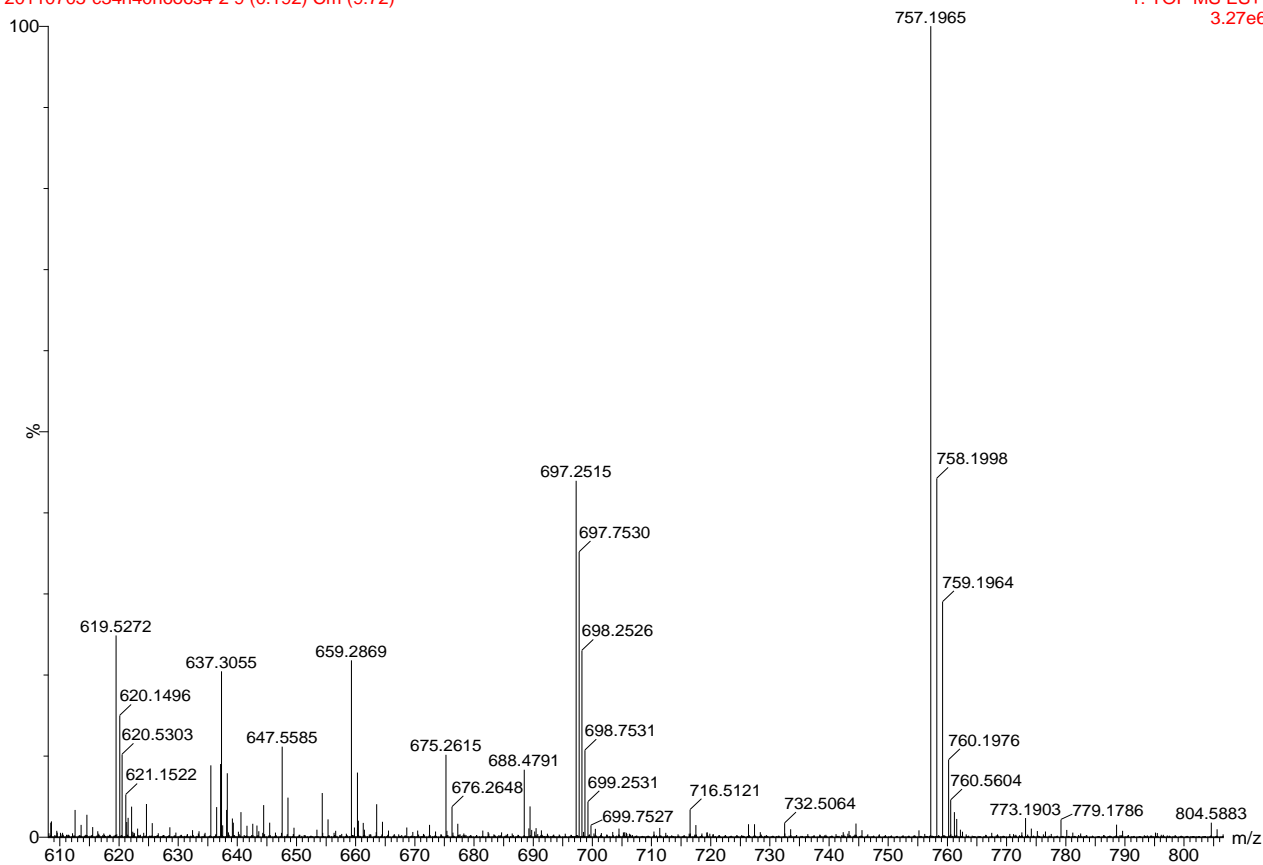

Figure S15. UV spectrum of 2.

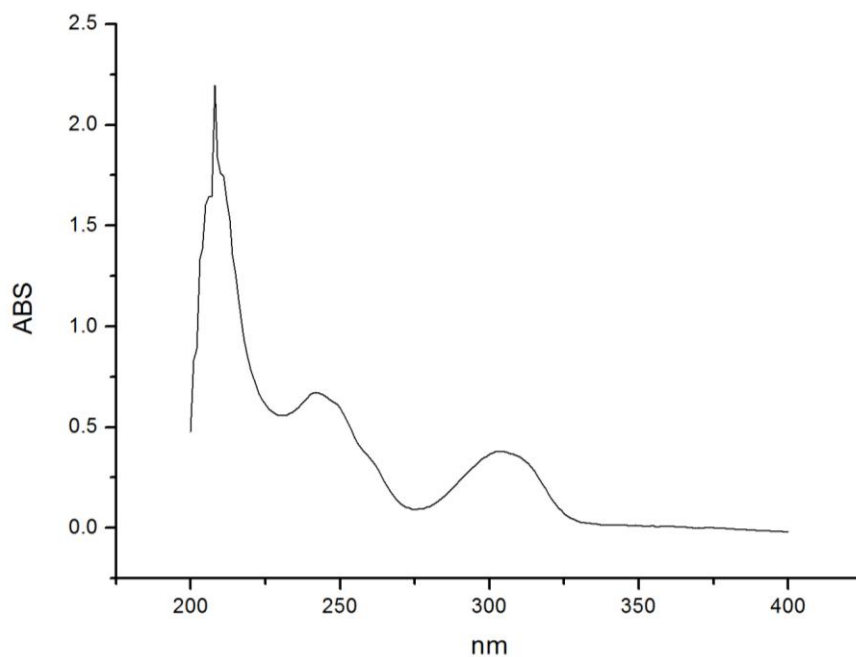

Figure S16. IR spectrum of 2.

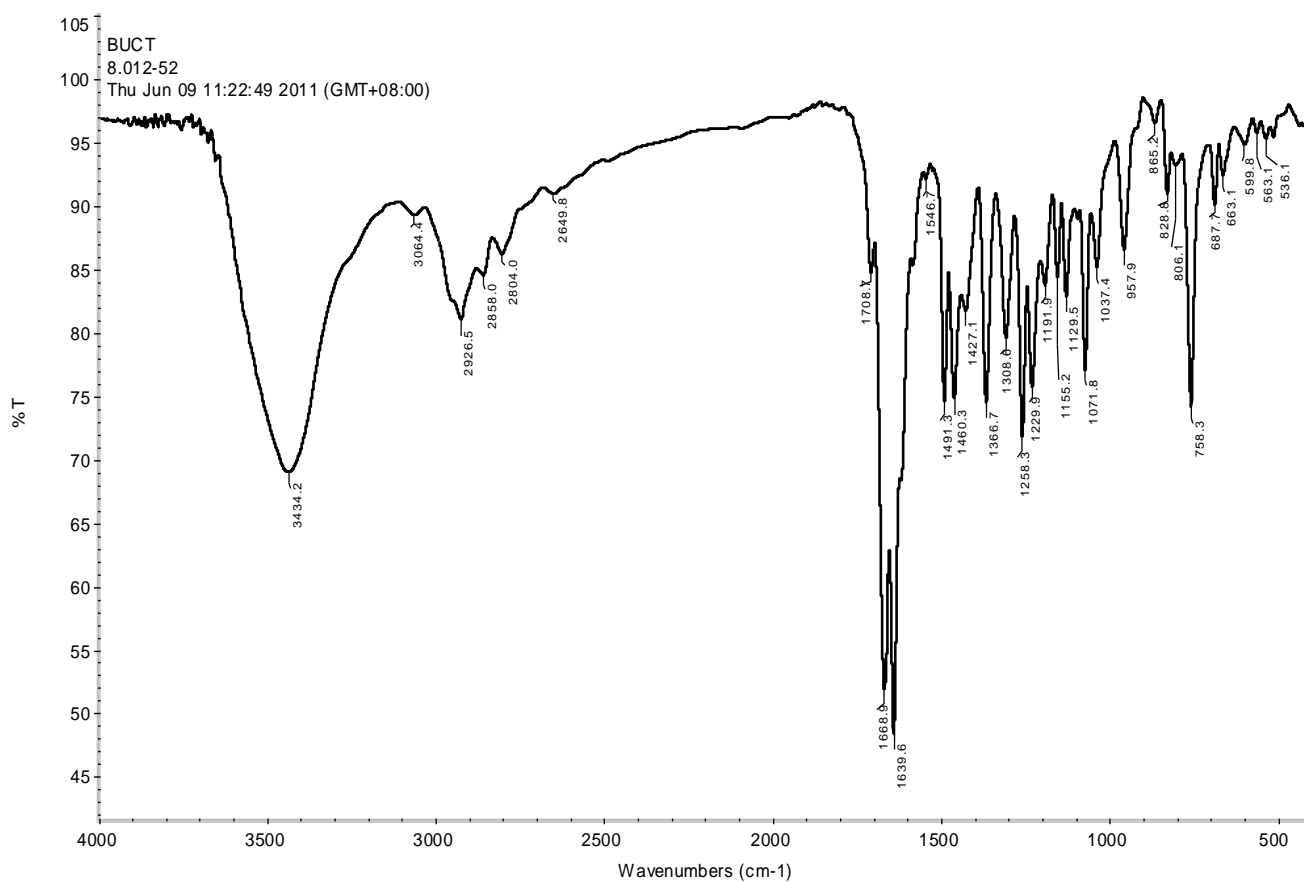

**Figure S17.**  $^1\text{H}$ -NMR spectrum (600 MHz, Acetone- $d_6$ ) of **2**.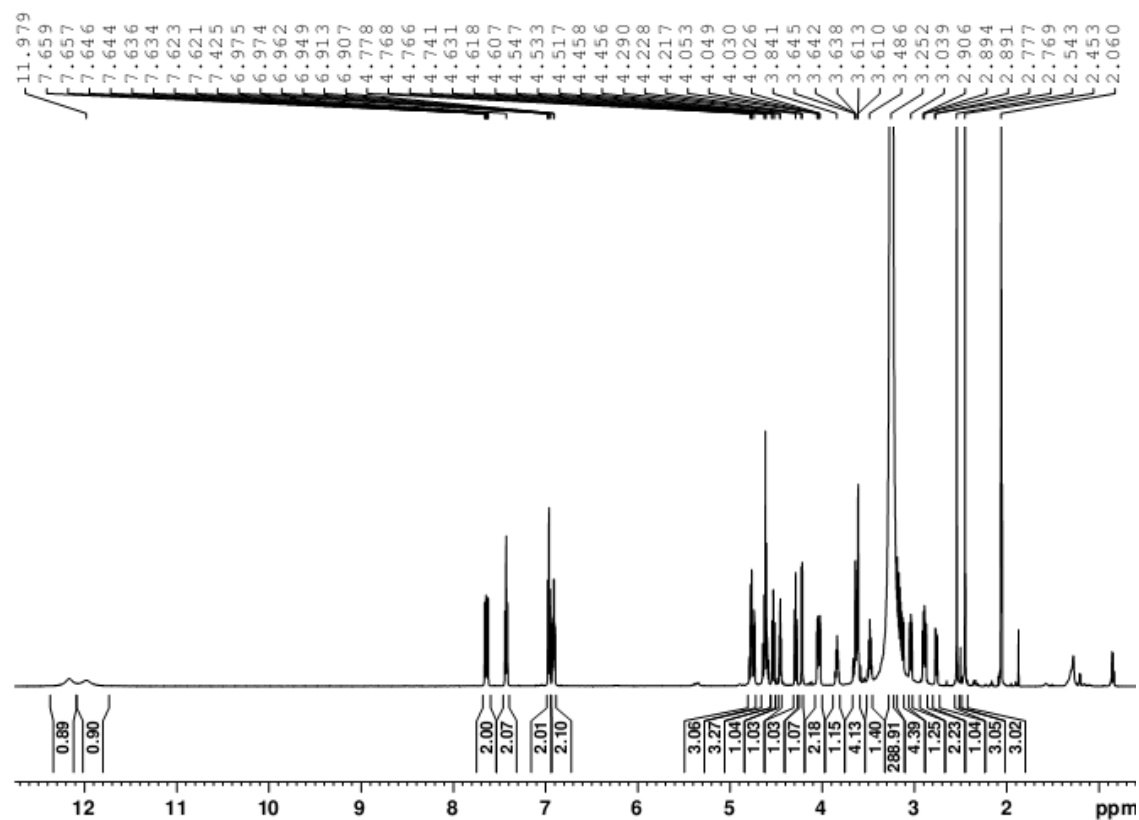**Figure S18.**  $^{13}\text{C}$ -NMR spectrum (150 MHz, Acetone- $d_6$ ) of **2**.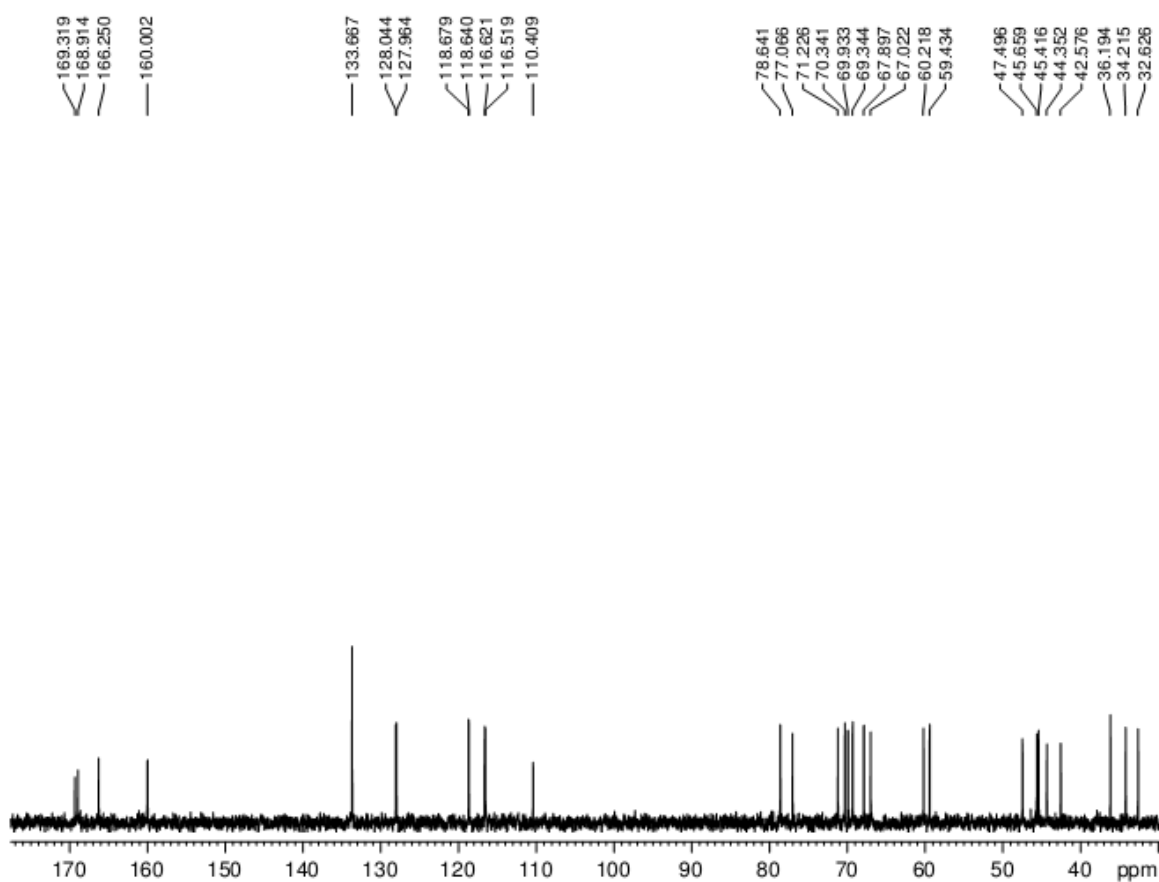

**Figure S19.** DEPT135 spectrum (150 MHz, Acetone- $d_6$ ) of **2**.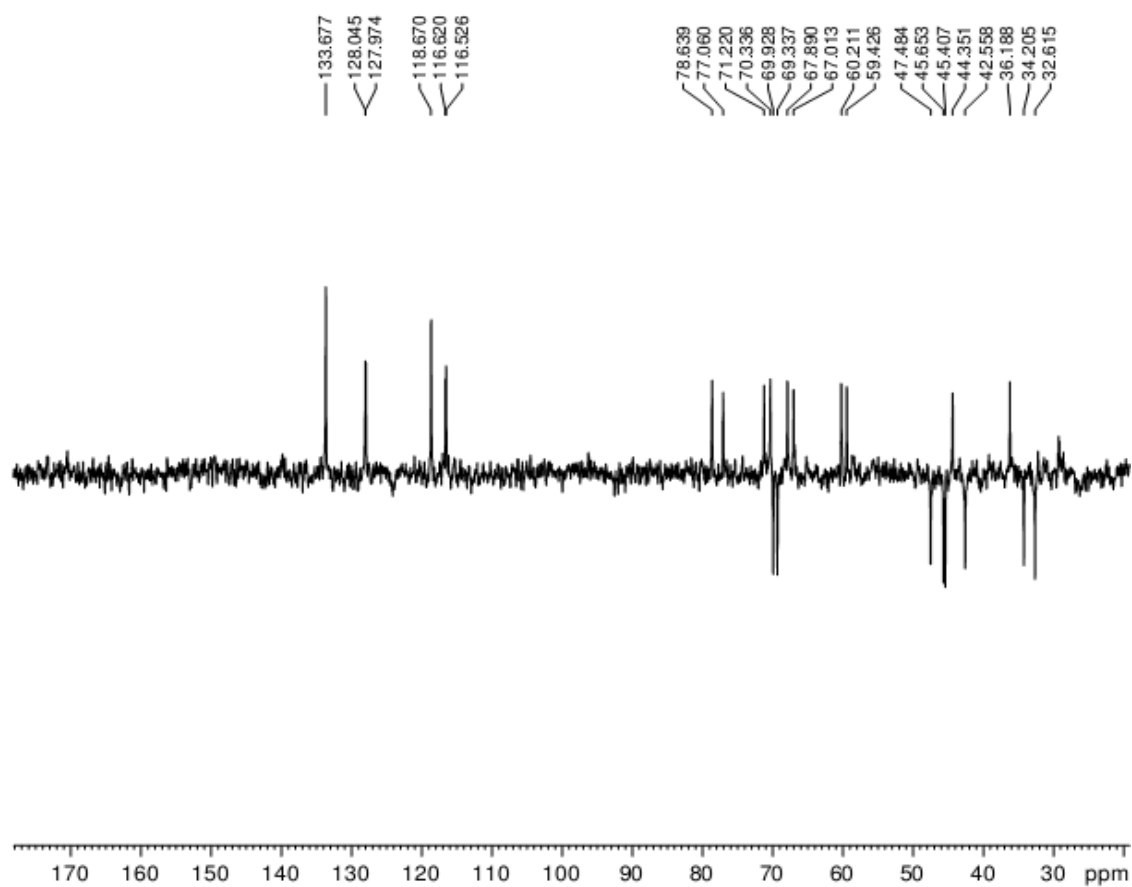**Figure S20.**  $^1\text{H}$ - $^1\text{H}$ -COSY spectrum (600  $\times$  600 MHz, Acetone- $d_6$ ) of **2**.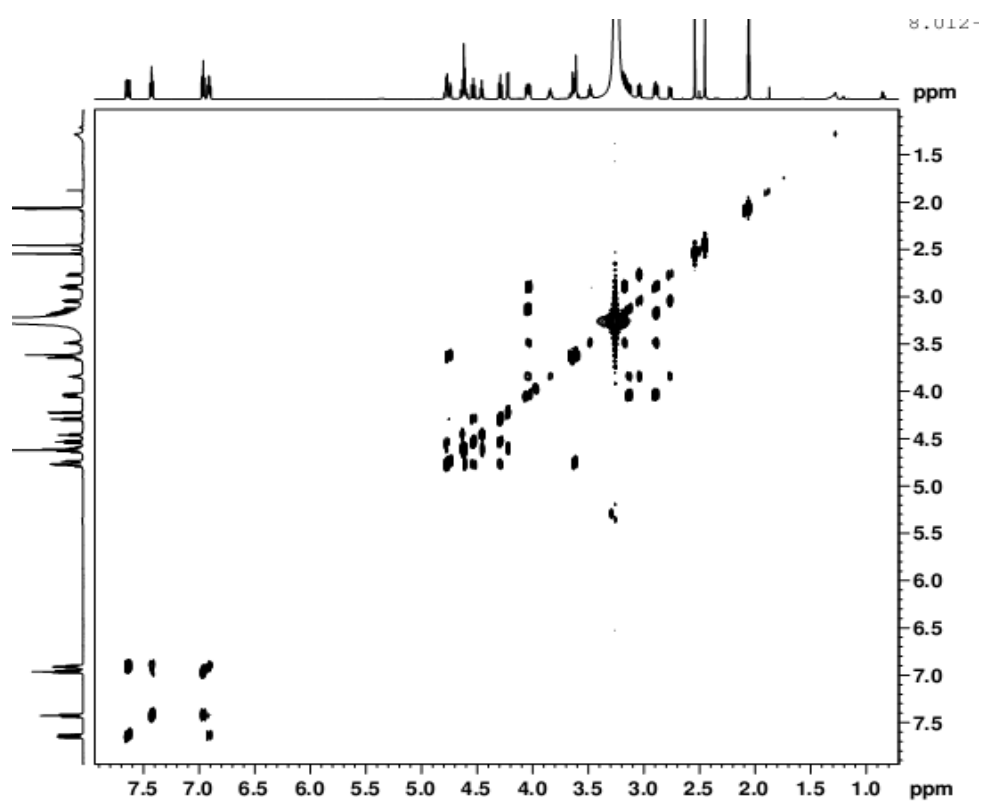

**Figure S21.**  $^1\text{H}$ - $^{13}\text{C}$ -HSQC spectrum ( $600 \times 150$  MHz, Acetone- $d_6$ ) of **2**.

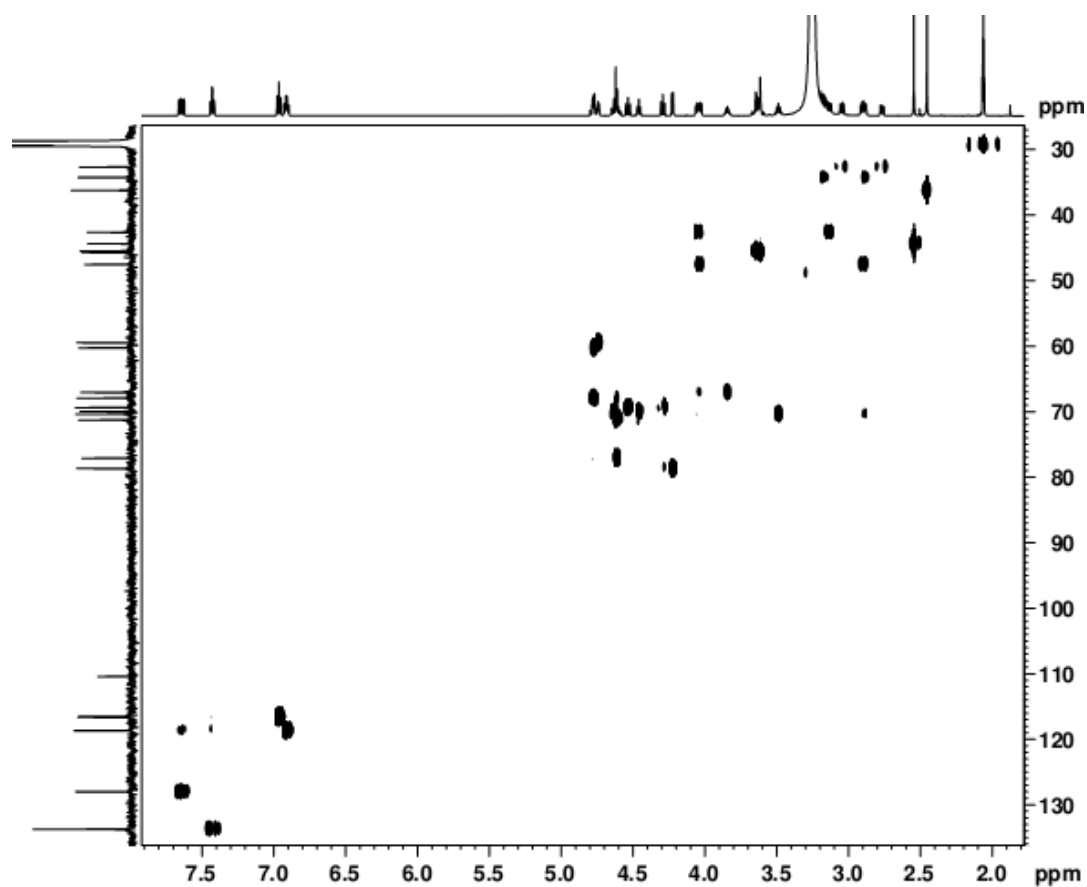

**Figure S22.**  $^1\text{H}$ - $^{13}\text{C}$ -HMBC spectrum ( $600 \times 150$  MHz, Acetone- $d_6$ ) of **2**.

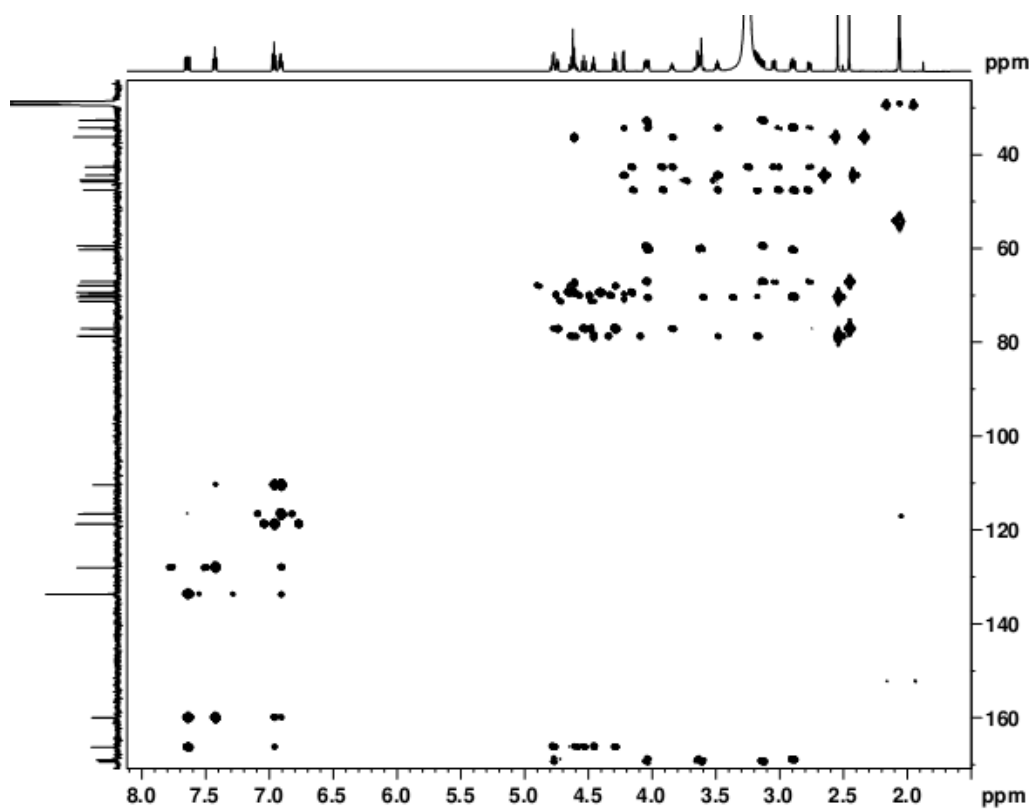

**Figure S23.**  $^1\text{H}$ - $^1\text{H}$ -ROESY spectrum ( $600 \times 600$  MHz, Acetone- $d_6$ ) of **2**.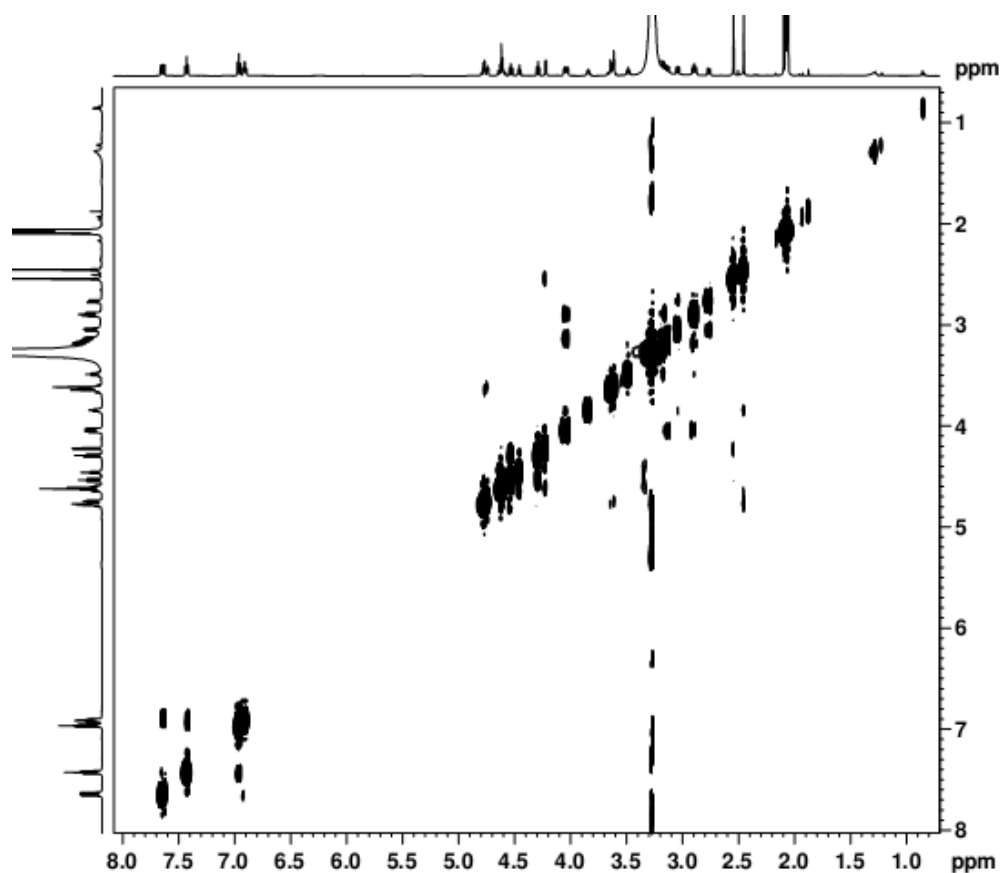**Figure S24.** HR-ESI-MS spectrum of **3**.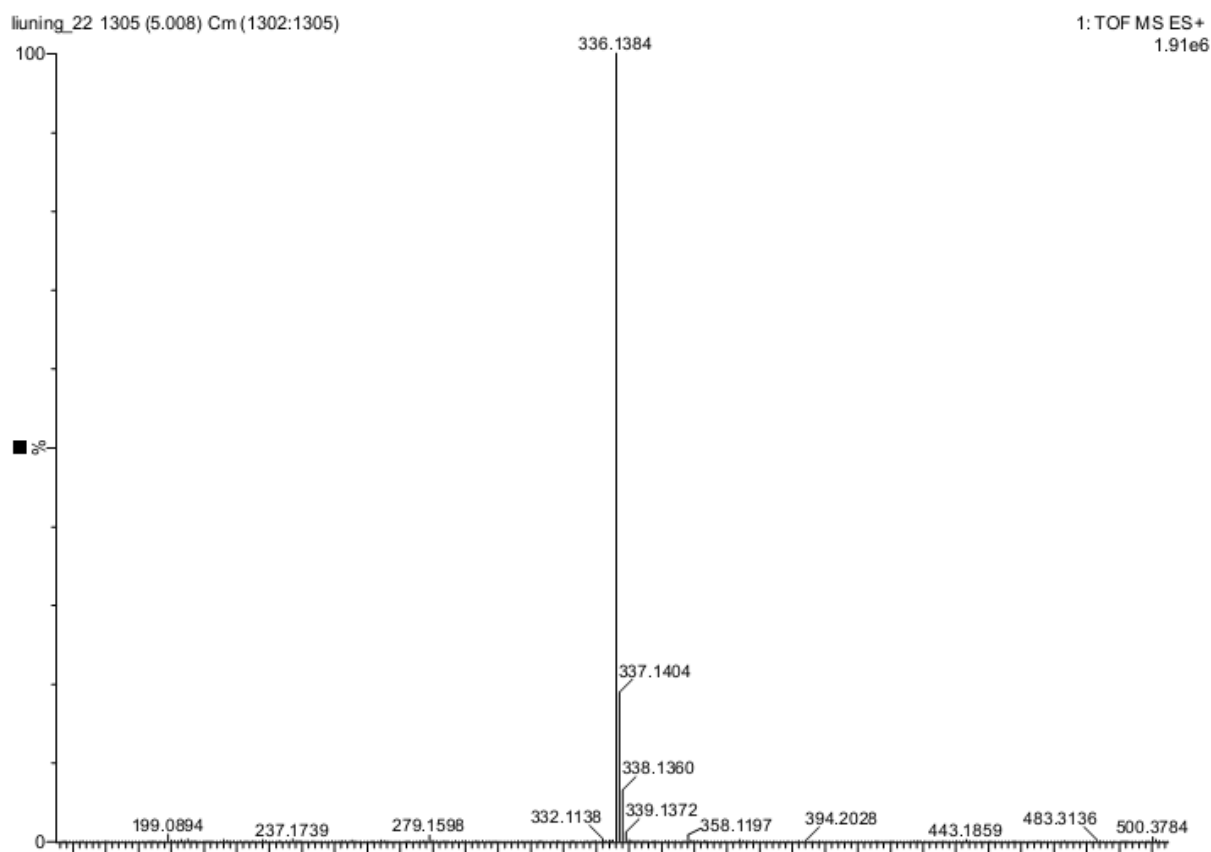

**Figure S25.**  $^1\text{H}$ -NMR spectrum (600 MHz,  $\text{CD}_3\text{OD}$ ) of **3**.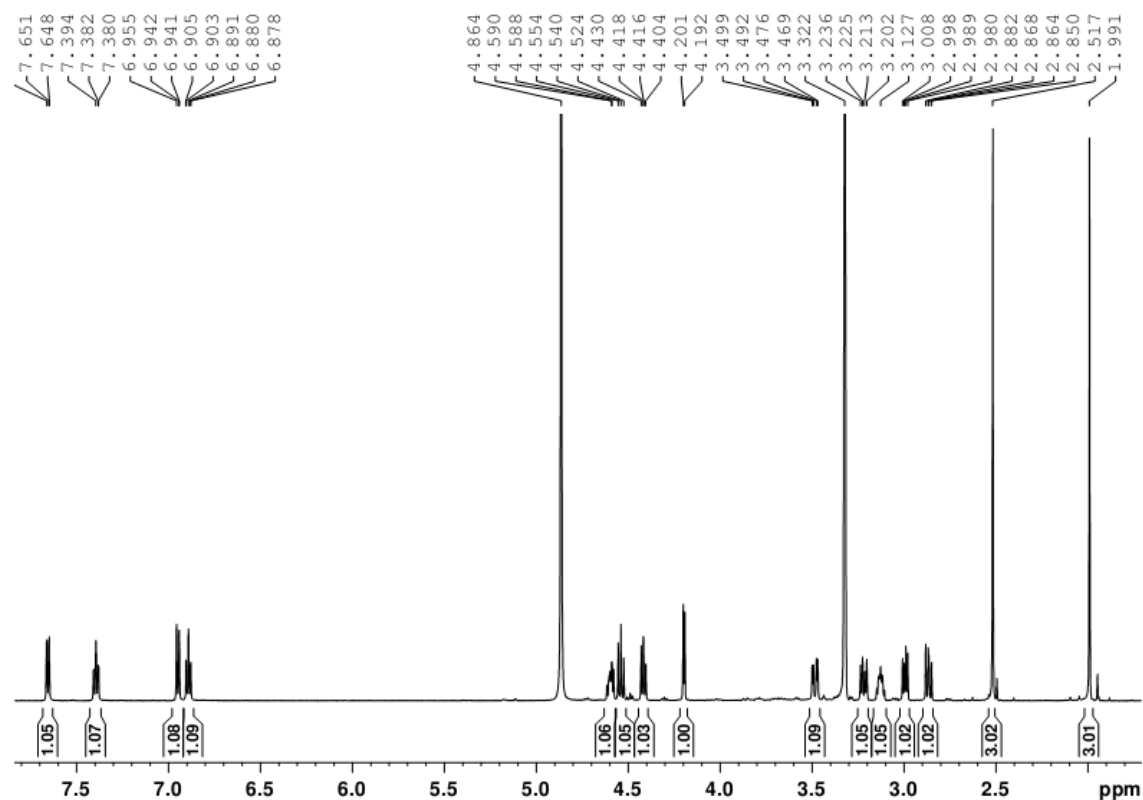**Figure S26.**  $^{13}\text{C}$ -NMR spectrum (150 MHz,  $\text{CD}_3\text{OD}$ ) of **3**.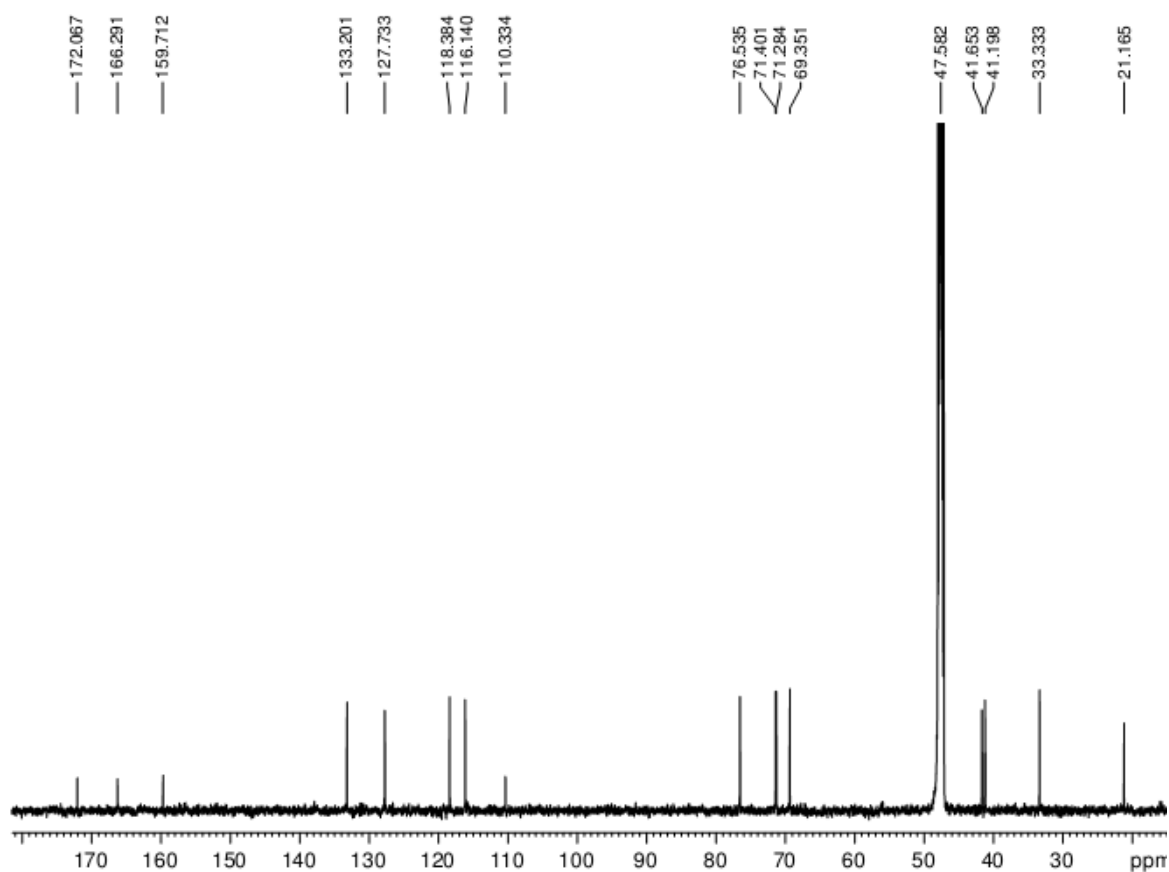

Figure S27. HR-ESI-MS spectrum of 4.

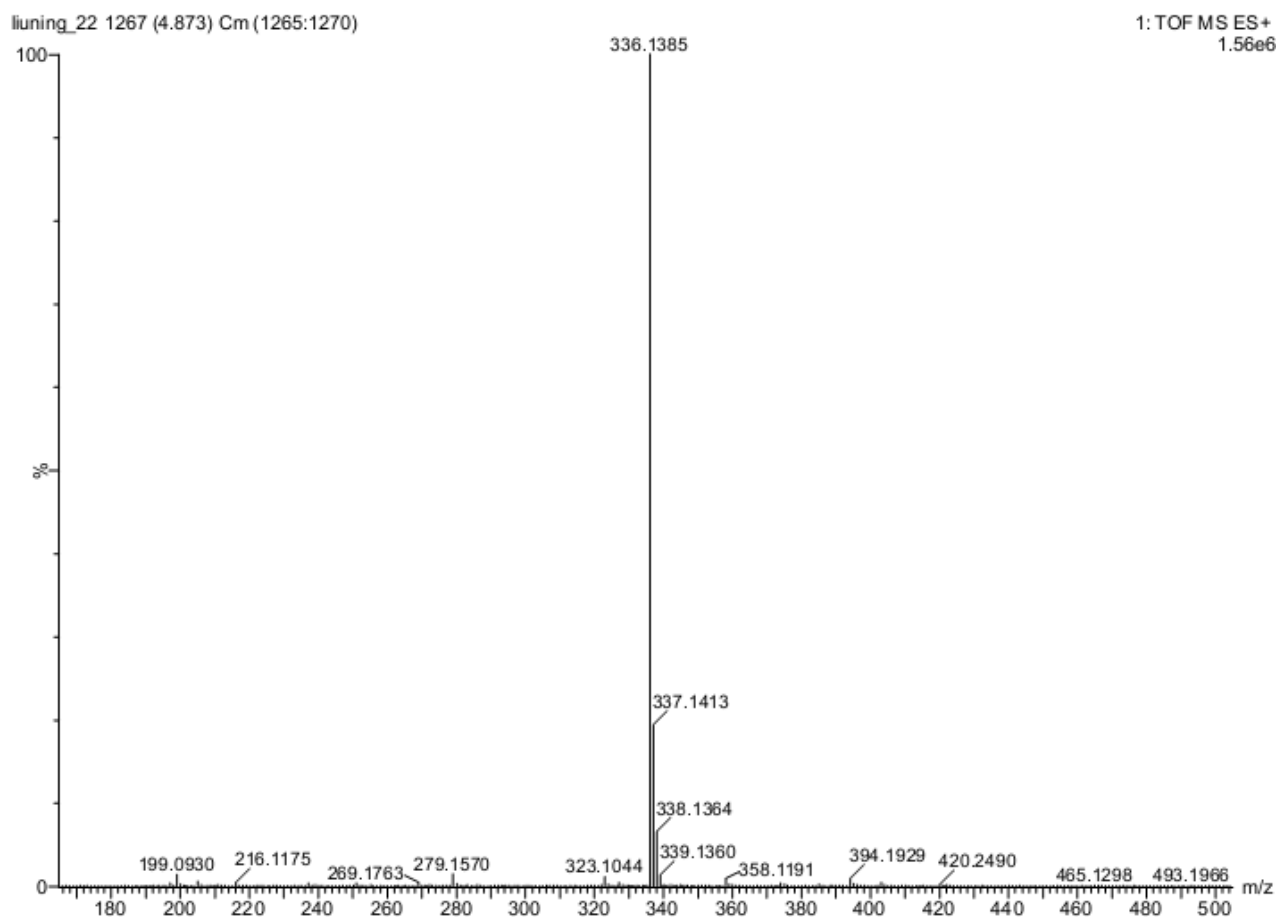Figure S28.  $^1\text{H}$ -NMR spectrum (600 MHz,  $\text{CD}_3\text{OD}$ ) of 4.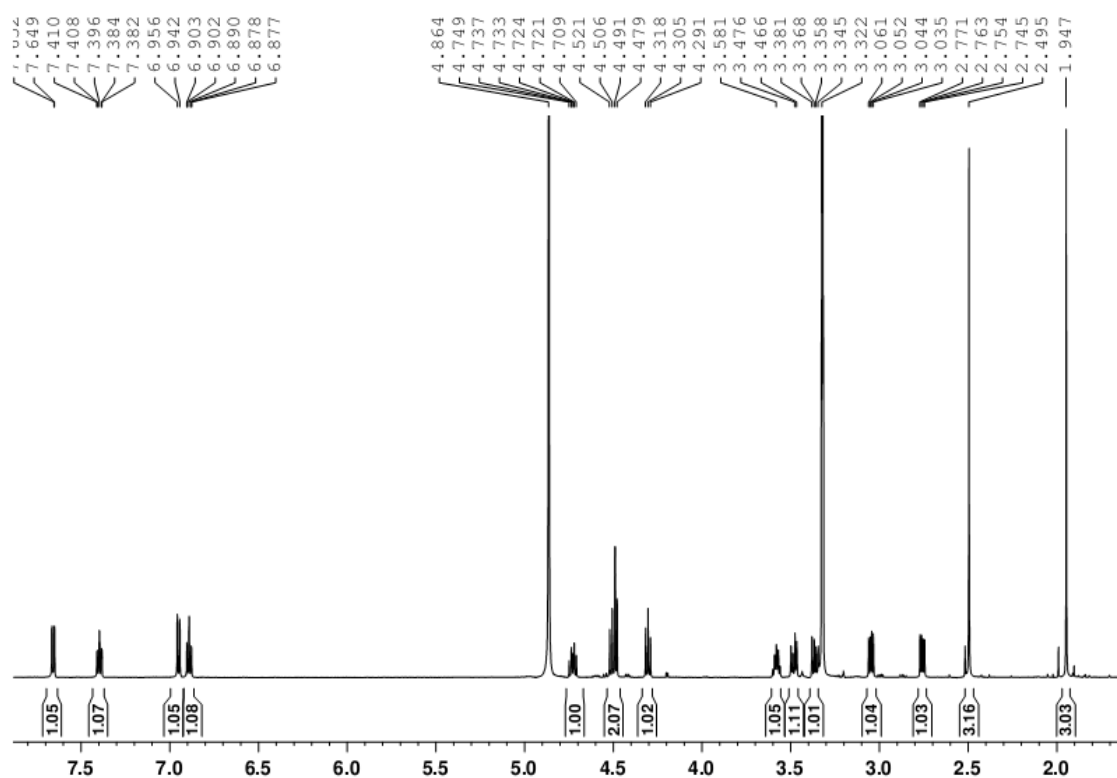

**Figure S29.**  $^{13}\text{C}$ -NMR spectrum (150 MHz,  $\text{CD}_3\text{OD}$ ) of **4**.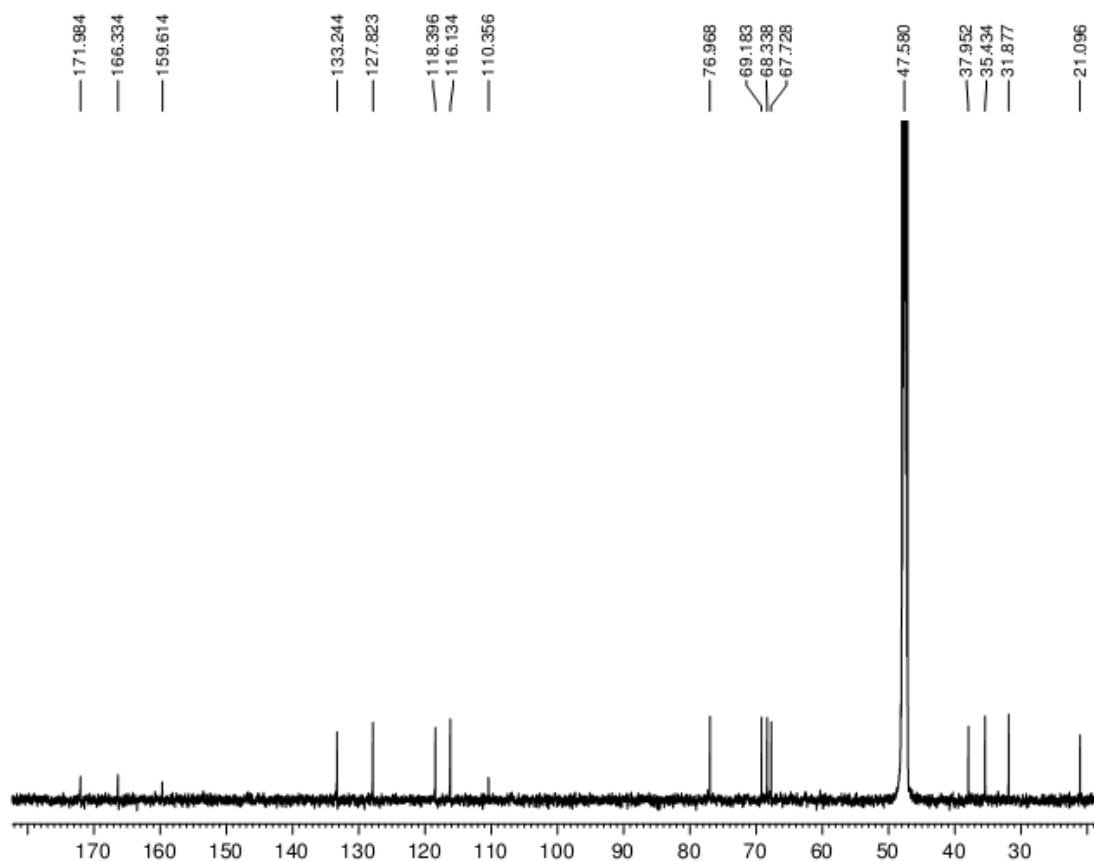**Figure S30.** HR-ESI-MS spectrum of **5**.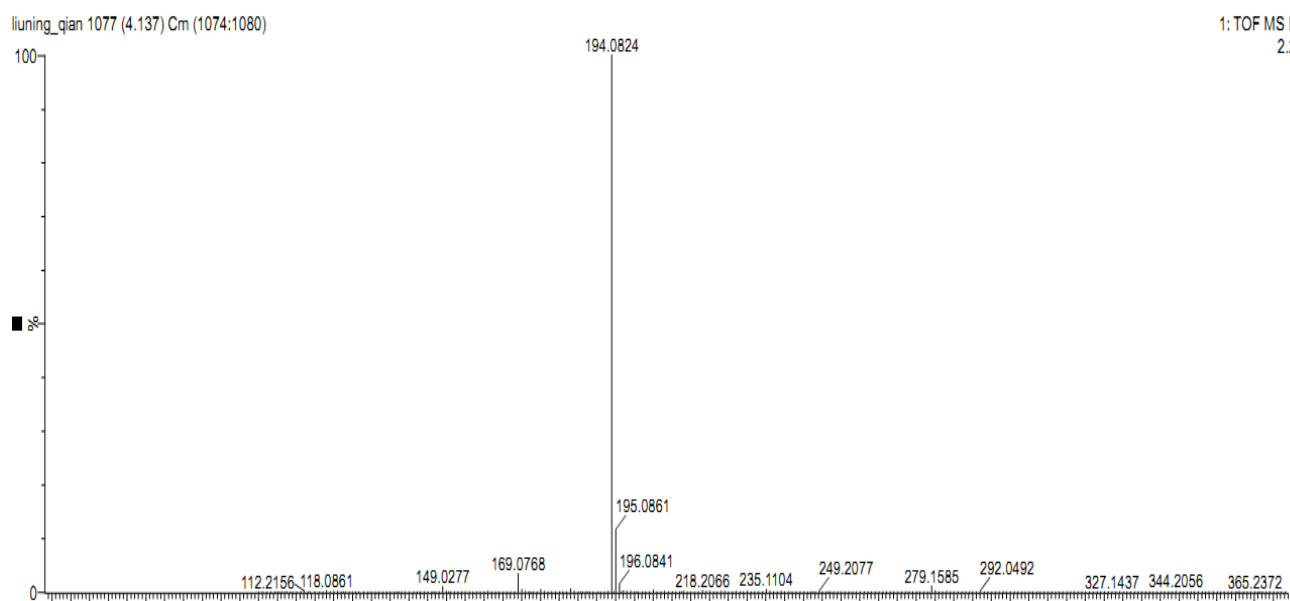

**Figure S31.**  $^1\text{H}$ -NMR spectrum (400 MHz, Acetone- $d_6$ ) of **5**.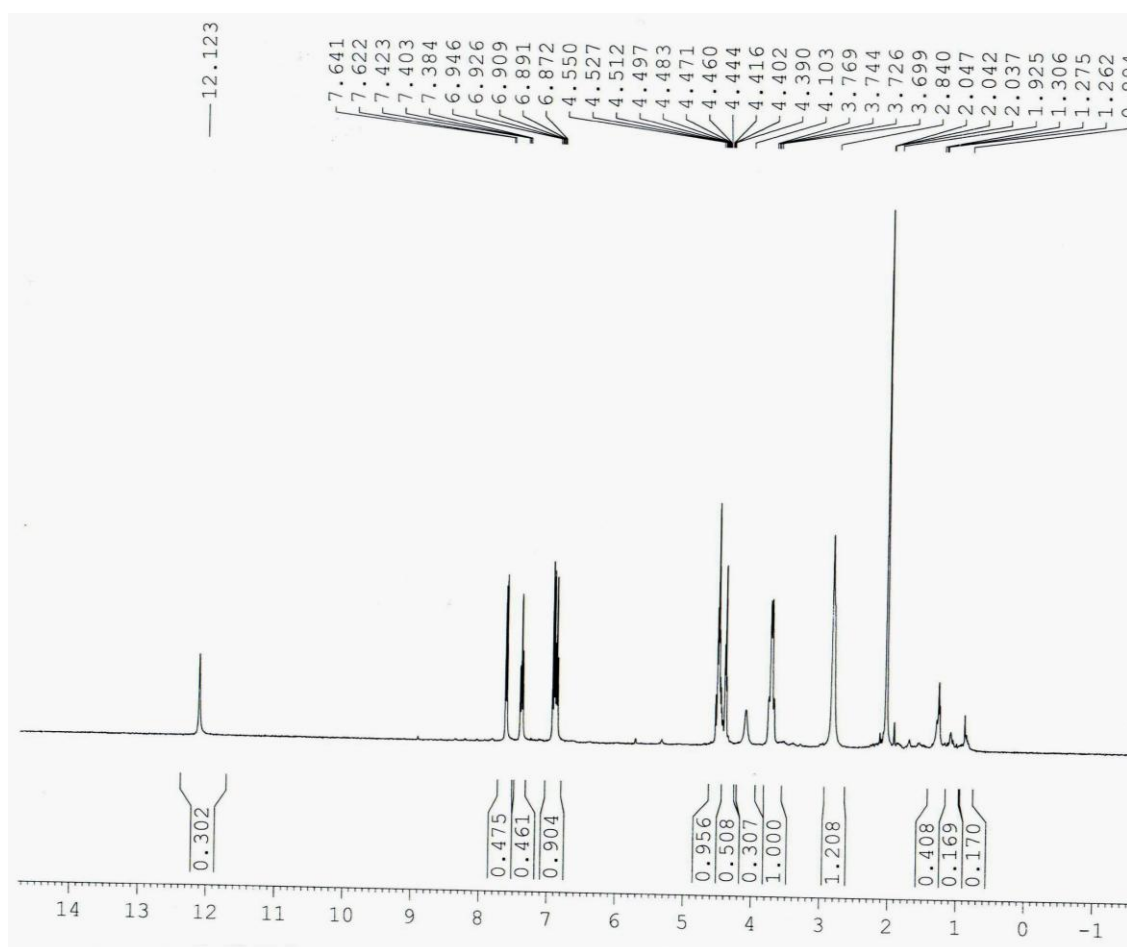

Supplement: Supplementary File 1 — Supplementary (PDF, 807 KB) [file marinedrugs-11-01524-s001.pdf]
