# Supplementary material for: Tetroazolemycins A and B, Two New Oxazole-Thiazole Siderophores from Deep-Sea Streptomyces olivaceus FXJ8.012
Source: MDPI journal article supplement (doi:10.3390/md11051524), 2013-05-09
Supplement: s2 [file s2]

marinedrugs-11-01524-s001.mol
  corina  04151403203D 1   1.00000     0.00000 
CORINA 3.49 0023  12.04.2013
 56 63  0  0  0  0  0  0  0  0999 V2000
   -2.2983  -14.0121    6.1035 C   0  0  0  0  0  0  0  0  0  0  0  0
   -2.4658  -13.2736    4.9425 C   0  0  0  0  0  0  0  0  0  0  0  0
   -2.4251  -15.3873    6.0737 C   0  0  0  0  0  0  0  0  0  0  0  0
   -2.7192  -16.0373    4.8872 C   0  0  0  0  0  0  0  0  0  0  0  0
   -2.8884  -15.3172    3.7233 C   0  0  0  0  0  0  0  0  0  0  0  0
   -2.7639  -13.9276    3.7404 C   0  0  0  0  0  0  0  0  0  0  0  0
   -2.9446  -13.1503    2.4967 C   0  0  0  0  0  0  0  0  0  0  0  0
   -3.2322  -13.7192    1.3073 O   0  0  0  0  0  0  0  0  0  0  0  0
   -3.7340  -12.6847    0.4364 C   0  0  0  0  0  0  0  0  0  0  0  0
   -3.0905  -11.4221    1.0597 C   0  0  0  0  0  0  0  0  0  0  0  0
   -2.8467  -11.8574    2.4487 N   0  0  0  0  0  0  0  0  0  0  0  0
   -4.0611  -10.2399    1.0242 C   0  0  0  0  0  0  0  0  0  0  0  0
   -2.1565  -11.1724    0.5565 H   0  0  0  0  0  0  0  0  0  0  0  0
   -2.3420  -11.9223    4.9705 O   0  0  0  0  0  0  0  0  0  0  0  0
   -4.5073   -9.8114   -0.7049 S   0  0  0  0  0  0  0  0  0  0  0  0
   -4.4989   -7.9921   -0.4702 C   0  0  0  0  0  0  0  0  0  0  0  0
   -4.1854   -7.8334    1.0354 C   0  0  0  0  0  0  0  0  0  0  0  0
   -3.3956   -8.9924    1.4936 N   0  0  0  0  0  0  0  0  0  0  0  0
   -3.3846   -6.5489    1.2582 C   0  0  0  0  0  0  0  0  0  0  0  0
   -4.2222   -5.3899    0.9399 N   0  0  0  0  0  0  0  0  0  0  0  0
   -4.1289   -4.8027   -0.3780 C   0  0  0  0  0  0  0  0  0  0  0  0
   -5.4002   -4.0812   -0.7594 C   0  0  0  0  0  0  0  0  0  0  0  0
   -6.0568   -3.3932    0.1978 N   0  0  0  0  0  0  0  0  0  0  0  0
   -5.7722   -3.6040    1.5820 C   0  0  0  0  0  0  0  0  0  0  0  0
   -5.0600   -4.9098    1.8881 C   0  0  0  0  0  0  0  0  0  0  0  0
   -7.0767   -2.4149   -0.1882 C   0  0  0  0  0  0  0  0  0  0  0  0
   -8.4086   -3.1313   -0.4203 C   0  0  0  0  0  0  0  0  0  0  0  0
   -9.3955   -2.1750   -0.9575 N   0  0  0  0  0  0  0  0  0  0  0  0
  -10.7438   -2.8076   -0.9188 C   0  0  0  0  0  0  0  0  0  0  0  0
  -10.7504   -3.6001    0.7377 S   0  0  0  0  0  0  0  0  0  0  0  0
   -8.9278   -3.7029    0.9191 C   0  0  0  0  0  0  0  0  0  0  0  0
  -11.8451   -1.7504   -1.0218 C   0  0  0  0  0  0  0  0  0  0  0  0
  -11.7534   -1.0164   -2.2989 N   0  0  0  0  0  0  0  0  0  0  0  0
  -12.9396   -0.9508   -2.8205 C   0  0  0  0  0  0  0  0  0  0  0  0
  -13.8960   -1.5424   -2.0745 O   0  0  0  0  0  0  0  0  0  0  0  0
  -13.2397   -2.4137   -1.1308 C   0  0  0  0  0  0  0  0  0  0  0  0
  -13.2177   -0.2889   -4.1120 C   0  0  0  0  0  0  0  0  0  0  0  0
  -12.1778    0.3068   -4.8360 C   0  0  0  0  0  0  0  0  0  0  0  0
  -12.4494    0.9250   -6.0472 C   0  0  0  0  0  0  0  0  0  0  0  0
  -13.7407    0.9526   -6.5358 C   0  0  0  0  0  0  0  0  0  0  0  0
  -14.7719    0.3649   -5.8223 C   0  0  0  0  0  0  0  0  0  0  0  0
  -14.5175   -0.2591   -4.6196 C   0  0  0  0  0  0  0  0  0  0  0  0
  -10.9093    0.2797   -4.3542 O   0  0  0  0  0  0  0  0  0  0  0  0
  -11.8045   -1.0651   -0.1751 H   0  0  0  0  0  0  0  0  0  0  0  0
   -9.0440   -1.7678   -2.3244 C   0  0  0  0  0  0  0  0  0  0  0  0
   -8.2648   -3.9444   -1.1318 H   0  0  0  0  0  0  0  0  0  0  0  0
   -5.2291   -5.4923    2.9384 O   0  0  0  0  0  0  0  0  0  0  0  0
   -5.8196   -4.1190   -1.8967 O   0  0  0  0  0  0  0  0  0  0  0  0
   -5.1176   -7.7827    1.5981 H   0  0  0  0  0  0  0  0  0  0  0  0
   -4.9193   -2.2530    2.4312 S   0  0  0  0  0  0  0  0  0  0  0  0
   -2.9757   -3.8866   -0.6021 C   0  0  0  0  0  0  0  0  0  0  0  0
   -3.2015   -2.3740    1.7933 C   0  0  0  0  0  0  0  0  0  0  0  0
   -3.2142   -2.1952   -0.0127 S   0  0  0  0  0  0  0  0  0  0  0  0
   -3.2552   -8.9889    2.9559 C   0  0  0  0  0  0  0  0  0  0  0  0
   -4.9526  -10.4538    1.6137 H   0  0  0  0  0  0  0  0  0  0  0  0
  -10.8454   -3.5538   -1.7068 H   0  0  0  0  0  0  0  0  0  0  0  0
  1  2  2  0      
  1  3  1  0      
  3  4  2  0      
  4  5  1  0      
  5  6  2  0      
  6  2  1  0      
  6  7  1  0      
  7  8  1  0      
  8  9  1  0      
  9 10  1  0      
 10 11  1  0      
 11  7  2  0      
 10 12  1  0      
 10 13  1  0      
  2 14  1  0      
 12 15  1  0      
 15 16  1  0      
 16 17  1  0      
 17 18  1  0      
 18 12  1  0      
 17 19  1  0      
 19 20  1  0      
 20 21  1  0      
 21 22  1  0      
 22 23  1  0      
 23 24  1  0      
 24 25  1  0      
 25 20  1  0      
 23 26  1  0      
 27 28  1  0      
 28 29  1  0      
 29 30  1  0      
 30 31  1  0      
 31 27  1  0      
 27 26  1  0      
 29 32  1  0      
 32 33  1  0      
 33 34  2  0      
 34 35  1  0      
 35 36  1  0      
 36 32  1  0      
 34 37  1  0      
 37 38  2  0      
 38 39  1  0      
 39 40  2  0      
 40 41  1  0      
 41 42  2  0      
 42 37  1  0      
 38 43  1  0      
 32 44  1  0      
 28 45  1  0      
 27 46  1  0      
 25 47  2  0      
 22 48  2  0      
 17 49  1  0      
 24 50  1  0      
 21 51  1  0      
 50 52  1  0      
 51 53  1  0      
 53 52  1  0      
 18 54  1  0      
 12 55  1  0      
 29 56  1  0      
M  END
$$$$
