# Supplementary material for: Tetroazolemycins A and B, Two New Oxazole-Thiazole Siderophores from Deep-Sea Streptomyces olivaceus FXJ8.012
Source: MDPI journal article supplement (doi:10.3390/md11051524), 2013-05-09
Supplement: s3 [file s3]

marinedrugs-11-01524-s001.mol
  ChemDraw04151415172D

 56 63  0  0  0  0  0  0  0  0999 V2000
   -7.5910    0.8538    0.0000 C   0  0  0  0  0  0  0  0  0  0  0  0
   -6.7660    0.8538    0.0000 C   0  0  0  0  0  0  0  0  0  0  0  0
   -8.0035    0.1393    0.0000 C   0  0  0  0  0  0  0  0  0  0  0  0
   -7.5910   -0.5752    0.0000 C   0  0  0  0  0  0  0  0  0  0  0  0
   -6.7660   -0.5752    0.0000 C   0  0  0  0  0  0  0  0  0  0  0  0
   -6.3535    0.1393    0.0000 C   0  0  0  0  0  0  0  0  0  0  0  0
   -5.5285    0.1393    0.0000 C   0  0  0  0  0  0  0  0  0  0  0  0
   -5.0436   -0.5281    0.0000 O   0  0  0  0  0  0  0  0  0  0  0  0
   -4.2589   -0.2732    0.0000 C   0  0  0  0  0  0  0  0  0  0  0  0
   -4.2589    0.5518    0.0000 C   0  0  0  0  0  0  0  0  0  0  0  0
   -5.0436    0.8067    0.0000 N   0  0  0  0  0  0  0  0  0  0  0  0
   -3.4621    0.3383    0.0000 C   0  0  0  0  0  0  0  0  0  0  0  0
   -3.8464    1.2663    0.0000 H   0  0  0  0  0  0  0  0  0  0  0  0
   -6.1826    1.4371    0.0000 O   0  0  0  0  0  0  0  0  0  0  0  0
   -3.1664   -0.4319    0.0000 S   0  0  0  0  0  0  0  0  0  0  0  0
   -2.3425   -0.3887    0.0000 C   0  0  0  0  0  0  0  0  0  0  0  0
   -2.1290    0.4081    0.0000 C   0  0  0  0  0  0  0  0  0  0  0  0
   -2.8209    0.8575    0.0000 N   0  0  0  0  0  0  0  0  0  0  0  0
   -1.4145    0.8206    0.0000 C   0  0  0  0  0  0  0  0  0  0  0  0
   -0.7001    0.4081    0.0000 N   0  0  0  0  0  0  0  0  0  0  0  0
   -0.7001   -0.4169    0.0000 C   0  0  0  0  0  0  0  0  0  0  0  0
    0.0144   -0.8294    0.0000 C   0  0  0  0  0  0  0  0  0  0  0  0
    0.7289   -0.4169    0.0000 N   0  0  0  0  0  0  0  0  0  0  0  0
    0.7289    0.4081    0.0000 C   0  0  0  0  0  0  0  0  0  0  0  0
    0.0144    0.8206    0.0000 C   0  0  0  0  0  0  0  0  0  0  0  0
    1.4433   -0.8294    0.0000 C   0  0  0  0  0  0  0  0  0  0  0  0
    2.1578   -0.4169    0.0000 C   0  0  0  0  0  0  0  0  0  0  0  0
    2.9256   -0.8366    0.0000 N   0  0  0  0  0  0  0  0  0  0  0  0
    3.4854   -0.2773    0.0000 C   0  0  0  0  0  0  0  0  0  0  0  0
    3.1498    0.4763    0.0000 S   0  0  0  0  0  0  0  0  0  0  0  0
    2.3293    0.3901    0.0000 C   0  0  0  0  0  0  0  0  0  0  0  0
    4.2823   -0.4909    0.0000 C   0  0  0  0  0  0  0  0  0  0  0  0
    5.0792   -0.7044    0.0000 N   0  0  0  0  0  0  0  0  0  0  0  0
    5.5285   -0.0125    0.0000 C   0  0  0  0  0  0  0  0  0  0  0  0
    5.0093    0.6287    0.0000 O   0  0  0  0  0  0  0  0  0  0  0  0
    4.2760    0.3136    0.0000 C   0  0  0  0  0  0  0  0  0  0  0  0
    6.3535   -0.0125    0.0000 C   0  0  0  0  0  0  0  0  0  0  0  0
    6.7660   -0.7269    0.0000 C   0  0  0  0  0  0  0  0  0  0  0  0
    7.5910   -0.7269    0.0000 C   0  0  0  0  0  0  0  0  0  0  0  0
    8.0035   -0.0125    0.0000 C   0  0  0  0  0  0  0  0  0  0  0  0
    7.5910    0.7020    0.0000 C   0  0  0  0  0  0  0  0  0  0  0  0
    6.7660    0.7020    0.0000 C   0  0  0  0  0  0  0  0  0  0  0  0
    6.3535   -1.4414    0.0000 O   0  0  0  0  0  0  0  0  0  0  0  0
    4.0687   -1.2877    0.0000 H   0  0  0  0  0  0  0  0  0  0  0  0
    3.2848   -1.5438    0.0000 C   0  0  0  0  0  0  0  0  0  0  0  0
    1.4433   -0.0044    0.0000 H   0  0  0  0  0  0  0  0  0  0  0  0
    0.0144    1.6456    0.0000 O   0  0  0  0  0  0  0  0  0  0  0  0
    0.0144   -1.6544    0.0000 O   0  0  0  0  0  0  0  0  0  0  0  0
   -1.5456   -0.1752    0.0000 H   0  0  0  0  0  0  0  0  0  0  0  0
    1.1598    1.1917    0.0000 S   0  0  0  0  0  0  0  0  0  0  0  0
   -1.1126   -1.1313    0.0000 C   0  0  0  0  0  0  0  0  0  0  0  0
    0.7541    1.4065    0.0000 C   0  0  0  0  0  0  0  0  0  0  0  0
   -0.6776   -1.3616    0.0000 S   0  0  0  0  0  0  0  0  0  0  0  0
   -3.0344    1.6544    0.0000 C   0  0  0  0  0  0  0  0  0  0  0  0
   -3.9571   -0.4101    0.0000 H   0  0  0  0  0  0  0  0  0  0  0  0
    3.8979    0.4372    0.0000 H   0  0  0  0  0  0  0  0  0  0  0  0
  1  2  2  0      
  1  3  1  0      
  3  4  2  0      
  4  5  1  0      
  5  6  2  0      
  6  2  1  0      
  6  7  1  0      
  7  8  1  0      
  8  9  1  0      
  9 10  1  0      
 10 11  1  0      
 11  7  2  0      
 10 12  1  0      
 10 13  1  1      
  2 14  1  0      
 12 15  1  0      
 15 16  1  0      
 16 17  1  0      
 17 18  1  0      
 18 12  1  0      
 17 19  1  1      
 19 20  1  0      
 20 21  1  0      
 21 22  1  0      
 22 23  1  0      
 23 24  1  0      
 24 25  1  0      
 25 20  1  0      
 23 26  1  0      
 27 28  1  0      
 28 29  1  0      
 29 30  1  0      
 30 31  1  0      
 31 27  1  0      
 27 26  1  1      
 29 32  1  0      
 32 33  1  0      
 33 34  2  0      
 34 35  1  0      
 35 36  1  0      
 36 32  1  0      
 34 37  1  0      
 37 38  2  0      
 38 39  1  0      
 39 40  2  0      
 40 41  1  0      
 41 42  2  0      
 42 37  1  0      
 38 43  1  0      
 32 44  1  1      
 28 45  1  0      
 27 46  1  6      
 25 47  2  0      
 22 48  2  0      
 17 49  1  6      
 24 50  1  0      
 21 51  1  0      
 50 52  1  0      
 51 53  1  0      
 53 52  1  0      
 18 54  1  0      
 12 55  1  6      
 29 56  1  6      
M  END
