# Supplementary material for: Tetroazolemycins A and B, Two New Oxazole-Thiazole Siderophores from Deep-Sea Streptomyces olivaceus FXJ8.012
Source: MDPI journal article supplement (doi:10.3390/md11051524), 2013-05-09
Supplement: s4 [file s4]

marinedrugs-11-01524-s002.mol
  corina  04151403203D 1   1.00000     0.00000 
CORINA 3.49 0023  12.04.2013
 26 28  0  0  0  0  0  0  0  0999 V2000
   -0.2226    1.5156    0.6017 C   0  0  0  0  0  0  0  0  0  0  0  0
   -0.1726    0.1356    0.4809 C   0  0  0  0  0  0  0  0  0  0  0  0
    0.9467    2.2505    0.6346 C   0  0  0  0  0  0  0  0  0  0  0  0
    2.1743    1.6165    0.5469 C   0  0  0  0  0  0  0  0  0  0  0  0
    2.2412    0.2443    0.4259 C   0  0  0  0  0  0  0  0  0  0  0  0
    1.0675   -0.5093    0.3925 C   0  0  0  0  0  0  0  0  0  0  0  0
    1.1325   -1.9800    0.2635 C   0  0  0  0  0  0  0  0  0  0  0  0
    2.2939   -2.6613    0.1735 O   0  0  0  0  0  0  0  0  0  0  0  0
    2.0149   -4.0447    0.4714 C   0  0  0  0  0  0  0  0  0  0  0  0
    0.5143   -4.1398    0.1027 C   0  0  0  0  0  0  0  0  0  0  0  0
    0.0783   -2.7357    0.2317 N   0  0  0  0  0  0  0  0  0  0  0  0
   -0.2359   -5.0339    1.0920 C   0  0  0  0  0  0  0  0  0  0  0  0
    0.4291   -6.7453    1.0614 S   0  0  0  0  0  0  0  0  0  0  0  0
   -1.1892   -7.5934    1.2252 C   0  0  0  0  0  0  0  0  0  0  0  0
   -2.1888   -6.4210    1.3548 C   0  0  0  0  0  0  0  0  0  0  0  0
   -1.6463   -5.2387    0.6582 N   0  0  0  0  0  0  0  0  0  0  0  0
   -3.5255   -6.8169    0.7245 C   0  0  0  0  0  0  0  0  0  0  0  0
   -4.1141   -7.9237    1.4828 N   0  0  0  0  0  0  0  0  0  0  0  0
   -5.2480   -8.5094    1.0496 C   0  0  0  0  0  0  0  0  0  0  0  0
   -5.8535   -9.6478    1.8296 C   0  0  0  0  0  0  0  0  0  0  0  0
   -5.7812   -8.1202    0.0322 O   0  0  0  0  0  0  0  0  0  0  0  0
   -2.3393   -6.1855    2.4084 H   0  0  0  0  0  0  0  0  0  0  0  0
   -2.4599   -4.0468    0.9325 C   0  0  0  0  0  0  0  0  0  0  0  0
    0.3864   -4.4987   -0.9186 H   0  0  0  0  0  0  0  0  0  0  0  0
   -1.3206   -0.5876    0.4490 O   0  0  0  0  0  0  0  0  0  0  0  0
   -0.1923   -4.6182    2.0986 H   0  0  0  0  0  0  0  0  0  0  0  0
  1  2  2  0      
  1  3  1  0      
  3  4  2  0      
  4  5  1  0      
  5  6  2  0      
  6  2  1  0      
  6  7  1  0      
  7  8  1  0      
  8  9  1  0      
  9 10  1  0      
 10 11  1  0      
 11  7  2  0      
 10 12  1  0      
 12 13  1  0      
 13 14  1  0      
 14 15  1  0      
 15 16  1  0      
 16 12  1  0      
 15 17  1  0      
 17 18  1  0      
 18 19  1  0      
 19 20  1  0      
 19 21  2  0      
 15 22  1  0      
 16 23  1  0      
 10 24  1  0      
  2 25  1  0      
 12 26  1  0      
M  END
$$$$
