# Supplementary material for: Tetroazolemycins A and B, Two New Oxazole-Thiazole Siderophores from Deep-Sea Streptomyces olivaceus FXJ8.012
Source: MDPI journal article supplement (doi:10.3390/md11051524), 2013-05-09
Supplement: s5 [file s5]

marinedrugs-11-01524-s002.mol
  ChemDraw04151415182D

 26 28  0  0  0  0  0  0  0  0999 V2000
   -3.9537    0.3185    0.0000 C   0  0  0  0  0  0  0  0  0  0  0  0
   -3.1287    0.3185    0.0000 C   0  0  0  0  0  0  0  0  0  0  0  0
   -4.3662   -0.3960    0.0000 C   0  0  0  0  0  0  0  0  0  0  0  0
   -3.9537   -1.1104    0.0000 C   0  0  0  0  0  0  0  0  0  0  0  0
   -3.1287   -1.1104    0.0000 C   0  0  0  0  0  0  0  0  0  0  0  0
   -2.7162   -0.3960    0.0000 C   0  0  0  0  0  0  0  0  0  0  0  0
   -1.8912   -0.3960    0.0000 C   0  0  0  0  0  0  0  0  0  0  0  0
   -1.4063   -1.0634    0.0000 O   0  0  0  0  0  0  0  0  0  0  0  0
   -0.6216   -0.8085    0.0000 C   0  0  0  0  0  0  0  0  0  0  0  0
   -0.6216    0.0165    0.0000 C   0  0  0  0  0  0  0  0  0  0  0  0
   -1.4063    0.2715    0.0000 N   0  0  0  0  0  0  0  0  0  0  0  0
    0.1753   -0.1970    0.0000 C   0  0  0  0  0  0  0  0  0  0  0  0
    0.4709   -0.9672    0.0000 S   0  0  0  0  0  0  0  0  0  0  0  0
    1.3263   -0.8571    0.0000 C   0  0  0  0  0  0  0  0  0  0  0  0
    1.5083   -0.1271    0.0000 C   0  0  0  0  0  0  0  0  0  0  0  0
    0.8164    0.3222    0.0000 N   0  0  0  0  0  0  0  0  0  0  0  0
    2.2228    0.2854    0.0000 C   0  0  0  0  0  0  0  0  0  0  0  0
    2.9372   -0.1271    0.0000 N   0  0  0  0  0  0  0  0  0  0  0  0
    3.6517    0.2854    0.0000 C   0  0  0  0  0  0  0  0  0  0  0  0
    4.3662   -0.1271    0.0000 C   0  0  0  0  0  0  0  0  0  0  0  0
    3.6517    1.1104    0.0000 O   0  0  0  0  0  0  0  0  0  0  0  0
    2.0917   -0.7105    0.0000 H   0  0  0  0  0  0  0  0  0  0  0  0
    0.4039    1.0367    0.0000 C   0  0  0  0  0  0  0  0  0  0  0  0
   -0.4081    0.8134    0.0000 H   0  0  0  0  0  0  0  0  0  0  0  0
   -2.7162    1.0330    0.0000 O   0  0  0  0  0  0  0  0  0  0  0  0
   -0.0382   -0.9939    0.0000 H   0  0  0  0  0  0  0  0  0  0  0  0
  1  2  2  0      
  1  3  1  0      
  3  4  2  0      
  4  5  1  0      
  5  6  2  0      
  6  2  1  0      
  6  7  1  0      
  7  8  1  0      
  8  9  1  0      
  9 10  1  0      
 10 11  1  0      
 11  7  2  0      
 10 12  1  0      
 12 13  1  0      
 13 14  1  0      
 14 15  1  0      
 15 16  1  0      
 16 12  1  0      
 15 17  1  1      
 17 18  1  0      
 18 19  1  0      
 19 20  1  0      
 19 21  2  0      
 15 22  1  6      
 16 23  1  0      
 10 24  1  1      
  2 25  1  0      
 12 26  1  6      
M  END
