# Supplementary material for: Tetroazolemycins A and B, Two New Oxazole-Thiazole Siderophores from Deep-Sea Streptomyces olivaceus FXJ8.012
Source: MDPI journal article supplement (doi:10.3390/md11051524), 2013-05-09
Supplement: s6 [file s6]

marinedrugs-11-01524-s003.mol
  corina  04151403203D 1   1.00000     0.00000 
CORINA 3.49 0023  12.04.2013
 14 15  0  0  0  0  0  0  0  0999 V2000
   -0.0167    1.3802    0.0096 C   0  0  0  0  0  0  0  0  0  0  0  0
    0.0021   -0.0041    0.0020 C   0  0  0  0  0  0  0  0  0  0  0  0
    1.2023   -0.6831   -0.0126 C   0  0  0  0  0  0  0  0  0  0  0  0
    2.4034    0.0268   -0.0202 C   0  0  0  0  0  0  0  0  0  0  0  0
    2.3805    1.4272   -0.0130 C   0  0  0  0  0  0  0  0  0  0  0  0
    1.1657    2.0946    0.0022 C   0  0  0  0  0  0  0  0  0  0  0  0
    3.6928   -0.6950   -0.0354 C   0  0  0  0  0  0  0  0  0  0  0  0
    4.8419   -0.0926   -0.0431 N   0  0  0  0  0  0  0  0  0  0  0  0
    3.5429    2.1278   -0.0198 O   0  0  0  0  0  0  0  0  0  0  0  0
    3.7837   -2.0414   -0.0368 O   0  0  0  0  0  0  0  0  0  0  0  0
    5.1176   -2.3904   -0.4602 C   0  0  0  0  0  0  0  0  0  0  0  0
    5.9052   -1.1160   -0.0664 C   0  0  0  0  0  0  0  0  0  0  0  0
    6.9637   -0.7807   -1.1190 C   0  0  0  0  0  0  0  0  0  0  0  0
    7.7469    0.3273   -0.6709 O   0  0  0  0  0  0  0  0  0  0  0  0
  1  2  2  0      
  2  3  1  0      
  3  4  2  0      
  4  5  1  0      
  5  6  2  0      
  6  1  1  0      
  4  7  1  0      
  7  8  2  0      
  9  5  1  0      
  7 10  1  0      
 10 11  1  0      
 11 12  1  0      
 12  8  1  0      
 12 13  1  0      
 13 14  1  0      
M  END
$$$$
