# Supplementary material for: Tetroazolemycins A and B, Two New Oxazole-Thiazole Siderophores from Deep-Sea Streptomyces olivaceus FXJ8.012
Source: MDPI journal article supplement (doi:10.3390/md11051524), 2013-05-09
Supplement: s7 [file s7]

marinedrugs-11-01524-s003.mol
  ChemDraw02251409262D

 14 15  0  0  0  0  0  0  0  0999 V2000
   -2.4256    0.8591    0.0000 C   0  0  0  0  0  0  0  0  0  0  0  0
   -2.4256    0.0341    0.0000 C   0  0  0  0  0  0  0  0  0  0  0  0
   -1.7111   -0.3784    0.0000 C   0  0  0  0  0  0  0  0  0  0  0  0
   -0.9967    0.0341    0.0000 C   0  0  0  0  0  0  0  0  0  0  0  0
   -0.9967    0.8591    0.0000 C   0  0  0  0  0  0  0  0  0  0  0  0
   -1.7111    1.2716    0.0000 C   0  0  0  0  0  0  0  0  0  0  0  0
   -0.2822   -0.3784    0.0000 C   0  0  0  0  0  0  0  0  0  0  0  0
    0.4323    0.0341    0.0000 N   0  0  0  0  0  0  0  0  0  0  0  0
   -0.2822    1.2716    0.0000 O   0  0  0  0  0  0  0  0  0  0  0  0
   -0.1107   -1.1854    0.0000 O   0  0  0  0  0  0  0  0  0  0  0  0
    0.7098   -1.2716    0.0000 C   0  0  0  0  0  0  0  0  0  0  0  0
    1.0454   -0.5179    0.0000 C   0  0  0  0  0  0  0  0  0  0  0  0
    1.8423   -0.3044    0.0000 C   0  0  0  0  0  0  0  0  0  0  0  0
    2.4256   -0.8878    0.0000 O   0  0  0  0  0  0  0  0  0  0  0  0
  1  2  2  0      
  2  3  1  0      
  3  4  2  0      
  4  5  1  0      
  5  6  2  0      
  6  1  1  0      
  4  7  1  0      
  7  8  2  0      
  9  5  1  0      
  7 10  1  0      
 10 11  1  0      
 11 12  1  0      
 12  8  1  0      
 12 13  1  0      
 13 14  1  0      
M  END
